# Supplementary material
Source: PubMed Central journal article supplement (PMC3189019)
Supplement: 1104473108_pnas.1104473108_SI.pdf [file 1104473108_pnas.1104473108_SI.pdf]

# Supporting Information

Michalek et al. 10.1073/pnas.1104473108

## SI Text

This supplemental document presents data, assumptions, methods, and additional analysis for the primary document “Valuation of Plug-in Vehicle Life-Cycle Air Emissions and Oil Displacement Benefits.” We begin by reviewing relevant literature for context. We then describe life-cycle emissions data followed by data for valuation of external damages caused by emissions and the oil premium. Finally, we present data on ownership costs, provide detail and analysis of results, and discuss conclusions and policy implications.

## Literature Review

Comparing the life-cycle costs and emissions benefits of vehicle electrification requires an understanding of (i) life-cycle emissions reduction potential of electrified vehicles, (ii) the value of reduced damages associated with emissions reduction, and (iii) the lifetime cost of ownership for each vehicle alternative. We review relevant literature in the following sections. Literature on the premium associated with oil consumption is reviewed separately in the oil consumption valuation section.

**Valuation of Emissions Damages from Vehicles.** Air emissions externalities from personal vehicle travel have been evaluated typically focusing on morbidity, mortality, and environmental impacts. These studies vary in scope, including study location, pollutants assessed, and inclusion versus exclusion of upstream life-cycle implications. A number of studies focus on estimating only the direct externalities of driving. Small and Kazimi (1) estimate mortality and morbidity from particulates and ozone in the Los Angeles region at 2.05 $\epsilon_{1992}$  per vehicle kilometer traveled (VKT), where subscripts on currency symbols are used to indicate the reference year. Mayeres et al. (2) forecast air pollution costs [ $\text{CO}_2$ , CO,  $\text{NO}_x$ ,  $\text{SO}_x$ , particulate matter ( $\text{PM}_{10}$ ), and volatile organic compounds (VOCs)] in Brussels in 2005 at 21–24 mECU<sub>1990</sub>/VKT (where ECU is the European currency unit) for cars and congestion costs as large as 1,387 mECU<sub>1990</sub>/VKT. Their study also quantifies costs associated with accidents (98–158 mECU<sub>1990</sub>/VKT) and noise (1–6 mECU<sub>1990</sub>/VKT). Maddison et al. (3) estimate external costs of air emissions ( $\text{NO}_x$ ,  $\text{SO}_x$ ,  $\text{PM}_{10}$ , VOCs including benzene, and lead) in the United Kingdom at 0.02–0.04  $\text{£}_{1993}$ /VKT for light-duty vehicles, and they go on to report congestion externalities through lost time evaluation as large as 36  $\text{£}_{1990}$ /VKT. McCubbin and Delucchi (4) estimate air pollution-related costs at 0.58–7.71  $\epsilon_{1992}$  per vehicle mile traveled (VMT) for US light-duty gasoline vehicles, quantifying mortality and chronic illness damages for ozone, CO,  $\text{NO}_2$ , particulates, and toxic pollution. Citing their earlier work (5), Delucchi and Lipman (6) report that the benefit of battery electric vehicles (BEVs) over conventional vehicles (CVs) is 0.4–3.7  $\epsilon_{2000}$ /VMT, and that external costs are small compared to other costs. Furthermore, Lipman and Delucchi (7), using estimates from Delucchi (8), include greenhouse gas (GHG) and oil-use (0.053–0.427  $\text{\$}_{2000}$  per gallon) as well as air pollution and noise damages (0.14–5.26  $\epsilon_{2000}$  per gallon) in a life-cycle cost analysis of internal combustion engine vehicles (ICEVs) and hybrid-electric vehicles (HEVs). Sen et al. (9) estimate air pollution costs (CO,  $\text{NO}_x$ , particulates, and hydrocarbons) in Delhi at 0.28–0.31 Rupees (Rs) for gasoline cars and 1.03–2.74 Rs for diesel cars. Mashayekh et al. (10) evaluate the top 86 US metropolitan regions and determine that  $\text{CO}_2$ ,  $\text{NO}_x$ , VOCs, CO,  $\text{SO}_x$ , particulates, and  $\text{NH}_3$  produce external costs of \$145 million per day in 2007 across the country plus an additional \$24 million per day due solely to congestion. Hill et al. (11) estimate that total climate change and

health-related costs for gasoline are about  $\text{\$}_{2008}$  0.71/gal and higher for corn ethanol. Thomas (12) calculates US urban air pollution, greenhouse gas, and oil displacement costs from 2000 to 2100 by evaluating alternative vehicle fleet penetration, estimating that exposure to VOCs, CO,  $\text{NO}_x$ , PM, and  $\text{SO}_2$  from the 2010 US passenger vehicle fleet produces approximately \$30 billion in healthcare costs and forecasting costs to 2100 using scenarios for alternative vehicle technology adoption.

A few studies have considered life-cycle air emissions externalities by evaluating services in larger transportation systems. Early in the development of economic input–output environmental assessment, Matthews et al. (13) evaluated the US transportation sector and showed that the inclusion of upstream transportation services increases external costs by as much 45%. Evaluating  $\text{SO}_2$ , CO,  $\text{NO}_2$ , VOC,  $\text{PM}_{10}$ , and GHGs, Matthews et al. (13) details the upstream supply chain activities that exist to support transportation services and their potential major emissions contributions in the life cycle. Recognizing the need to compare different vehicle and fuel technologies within a life-cycle framework, The National Research Council (NRC) (14) developed external cost estimates for passenger and freight modes at each of the approximately 3,000 US counties. The gasoline and diesel vehicle costs range from 1.3–1.8  $\epsilon_{2007}$ /VMT for light-duty automobiles to 3.23–10.41  $\epsilon_{2007}$ /VMT for heavy-duty vehicles, for driving in 2005. They also report damages for grid-independent HEVs at 1.22  $\epsilon_{2007}$ /VMT, grid-dependent HEVs at 1.46  $\epsilon_{2007}$ /VMT, and electric vehicles at 1.72  $\epsilon_{2007}$ /VMT, assuming average electricity. Lastly, by applying life-cycle inventories to cities, Chester et al. (15) estimates external costs for passenger transportation in the San Francisco, Chicago, and New York City metropolitan areas at 0.5–64  $\epsilon_{2008}$  per vehicle trip, depending on vehicle location, age, speed, and driving time.

The variation in external cost estimates across these studies, even when comparing air emissions exclusively, is the result of a myriad of factors. These include the vehicles evaluated (year, emission profiles), pollutants considered, population demographics (impacts to the people exposed), valuation scheme (unit external cost assessed based on impact literature for a particular region), driving characteristics (free flow or congestion), and life-cycle considerations (only tailpipe emissions vs. inclusion of emissions associated with upstream activities required for transportation services). Furthermore, some studies include human health impacts exclusively (and choose a value of statistical life), whereas others capture climate change, vegetation, visibility, material, and aquatic damages, to name a few.

In our study, we adopt the scope and framework of the NRC study (14) for externality valuation, accounting for life-cycle emissions of  $\text{NO}_x$ ,  $\text{SO}_2$ , PM, CO, VOCs, and GHGs including  $\text{CO}_2$ ,  $\text{CH}_4$ , and  $\text{N}_2\text{O}$  for each vehicle type; accounting for damages associated with environmental impact, mortality, and morbidity (using a \$6 million value of statistical life); and assessing location-specific damages in the regions where emissions take place. We assume that other externalities associated with driving, such as congestion costs (16, 17), will not be substantially different as a result of powertrain choice, and thus we do not include such factors in the assessment.

**Emission Reduction Potential of Electrified Vehicles.** Several studies estimate the emissions reductions that can be achieved with electrified vehicles. Lipman and Delucchi provide a recent review for GHG emissions (18). The Electric Power Research Institute (EPRI) conducted a two-part study with the National Resources Defense Council on the potential of plug-in hybrid-electric vehi-

cles (PHEVs) to reduce use-phase GHGs and air pollutants (19). Their study included detailed projections of vehicle time-of-day charging, regional market penetration, plant dispatch policy, plant retirement, new plant construction, technological advancement, and public policy. Under these assumptions, the study estimates GHG reduction potential of 163–612 million metric tons (t) per year by 2050 depending on penetration and grid mix scenarios (19). The electricity used to charge PHEVs in the study's future scenarios is assumed to be 33–84% less carbon intensive than the current US generation portfolio (20). Samaras and Meisterling (20) estimate that life-cycle GHG emissions associated with PHEVs may be 32% lower than conventional vehicles under an average US grid mix, but only slightly lower than HEVs. However, net emissions depend critically on the source of electricity generation: Life-cycle emissions under coal electricity are estimated at 9–18% higher than HEVs, whereas a low carbon electricity generation mix could reduce GHG emissions by 30–47% over HEVs. Bradley and Frank (21) review PHEV GHG reductions ranging from 27–67%. Sioshansi and Denholm (22) apply optimization dispatch models, finding that marginal emissions associated with charging plug-in vehicles may depend strongly on vehicle charge timing. Thompson et al. (23) modeled air quality impacts of PHEVs charged overnight in a regional grid and found both improvements and worsening of air quality indicators, depending on spatial and temporal patterns. Peterson et al. (24) modeled CO<sub>2</sub>, NO<sub>x</sub>, and SO<sub>2</sub> net emissions in the New York and PJM Interconnection electricity grids and found net reductions in CO<sub>2</sub> and NO<sub>x</sub>, but either small or large increases in SO<sub>2</sub> depending on stringency of SO<sub>2</sub> emissions caps. Finally, Argonne National Laboratory (ANL) has conducted a range of studies on life-cycle emissions associated with vehicle use as well as vehicle and fuel production, and they have collected the resulting models into an analysis tool called The Greenhouse Gases, Regulated Emissions, and Energy Use in Transportation Model, or GREET (25). In particular, a 2010 well-to-wheels analysis (26) identifies vehicle efficiency and tailpipe emissions using the Powertrain Systems Analysis Toolkit, also developed at Argonne.

In our study, we adopt GREET and the vehicle profiles defined by ANL, which provide documentation of vehicle specifications, efficiency, and emissions for estimating characteristics of each vehicle alternative.

**Cost of Electrified Vehicles.** As with many new technologies, early adopters and enthusiasts will provide niche market demand for electrified transportation, even if costs of electrified vehicles are substantially higher. However, in order for plug-in vehicles to achieve broad market success, they must be cost competitive with other conventional and advanced transportation options. Because of high uncertainty, cost estimates often examine a range of potential battery prices and fuel costs. Delucchi and Lipman (6) review several cost estimates for BEVs, PHEVs, and fuel cell vehicles. For example, Kromer and Heywood (27) estimate future price premiums for PHEVs and BEVs, and Delucchi and Lipman (5) estimate costs for battery electric vehicles with various battery pack sizes. Argonne's 2009 vehicle futures study (28) estimates vehicle systems costs for CVs, HEVs, PHEVs, BEVs, and other vehicles in 2015, 2030, and 2045 using literature review and expert interviews, and they compare estimates to Department of Energy (DOE) program goals. Scott et al. (29) found that the maximum PHEV premium consumers would be willing to pay relative to other types vehicles would range from \$0–\$4,600. Lemoine et al. (30, 31) estimated that batteries prices would have to fall to less than \$600/kWh for PHEVs and \$200/kWh for BEVs to be competitive with HEVs and CVs. Shiau et al. (32) estimated that PHEV battery pack prices below \$400/kWh are needed for optimized plug-in vehicles to be competitive with HEVs if consumers use discount rates above 10%. Karplus et al. (33) modeled

costs and emissions and found that PHEV cost premiums of 15% above CVs were favorable for adoption but current premiums were around 30–80%. Shiau et al. (34) found that small PHEVs with a 7-mi all-electric range could be competitive with current HEVs if charged frequently (assuming sufficient battery life), whereas increasing battery size to extend electric range only achieves economic competitiveness under optimistic assumptions. Finally, an NRC report (35) estimated the costs of PHEV batteries at \$625–\$850/kWh at the pack level. The NRC forecasted that PHEVs with 40-mile battery packs are unlikely to achieve cost effectiveness before 2040 with gasoline prices below \$4.00/gal, however, PHEVs with 10-mile battery packs will likely fare better (35). Most studies examining PHEV costs (32, 34, 36, 37) find that PHEVs become more competitive as they drive more of their miles on electricity but become less competitive as more batteries are added. Hence frequent charging increases the economic viability of PHEVs, if battery life is not compromised. All of these studies imply that economic competitiveness of PHEVs depends on inexpensive, reliable batteries and relatively expensive gasoline.

In our study, we adopt ANL's cost estimates (28), which provide a comprehensive and detailed cost breakdown for projections over several decades, and we use DOE targets for sensitivity analysis. These estimates span the range of electric vehicle cost premium estimates reviewed by Delucchi and Lipman (6).

**Cost Effectiveness of Emissions Reduction.** The cost of reducing GHGs with electrified transportation is a critical factor to maximize the effectiveness of policy objectives. Lutsey and Sperling (38) constructed a cost supply curve of transportation GHG mitigation options and found that most cost effective options involved improving conventional vehicle efficiency, while excluding PHEVs due to cost considerations. Kammen et al. (39) estimated the cost effectiveness of GHG abatement with PHEVs by dividing the additional subsidy required to make PHEVs competitive after discounted fuel cost savings are included by the estimated GHG savings. The authors conclude that costs of GHG mitigation with PHEVs are well over \$100/t-CO<sub>2</sub>e. Studies by Shiau et al. (32) and Argonne National Laboratories (28) also state that the cost of GHG mitigation with PHEVs and BEVs is well over \$100/t, and CO<sub>2</sub> taxes below \$100/t offer little leverage for improving cost competitiveness of PHEVs. However, Kammen et al. (39) notes that

While we focus on PHEVs' value as a strategy to abate GHGs, PHEVs also offer social benefits through reduced petroleum consumption and reduced urban air pollution that many other GHG abatement options will not. Any comparison of PHEVs with other abatement technologies on the basis of the metric \$/tCO<sub>2</sub>e is therefore incomplete. However, we consider only GHGs and leave other air pollutants for future research.

It is our intention in this work to address this research gap by assessing cost-effectiveness of combined air pollution and oil consumption reduction benefits of electrified vehicles in addition to GHG reduction benefits.

**US Public Policy.** Since 2005, the US Congress has enacted several laws that include support and restrictions for alternative vehicles and fuels. The Energy Policy Act of 2005 included provisions to support alternative vehicles through tax credits as well as mandated that ethanol and other renewable fuels be blended with gasoline. Tax credits were created to support ethanol and biodiesel fuels. The 2007 Energy Independence and Security Act (EISA) expanded the renewable fuel mandate and increased the Corporate Average Fuel Economy (CAFE) standards. EISA set a goal of 35 mi/gal by 2020. The American Recovery and Reinvest-

ment Act of 2009 included provisions to support alternative fuels and advanced vehicles. Such incentives included tax credits for the purchase of electric vehicles as well as support for research and development of batteries that can be used in advanced vehicles.

In addition to efforts by Congress, several states have enacted regulation to reduce GHG emissions. Most notable are the efforts in California. In 2006, the California legislature passed Assembly Bill 32, the Global Warming Solutions Act. Through this act, the legislature set a cap for GHG emissions by 2020. Under this law, the California Air Resources Board (CARB) was directed to identify emission reduction mechanisms. Since then, CARB has been working to amend the Low Emission Vehicle Program with the goal of developing more stringent tailpipe and GHG emissions standards for new passenger vehicles. CARB has a zero emission vehicle program to support deployment of plug-in hybrid vehicles, battery electric vehicles, and hydrogen fuel cell vehicles, and CARB has also developed the Low Carbon Fuel Standard, which established a goal of reducing by 10% the carbon intensity of transportation fuels sold in the state by 2020. CARB and its partners (the California Environmental Protection Agency, the University of California, and the California Energy Commission) have been working to identify the fuels that can meet such standards. The fuels under consideration include compressed natural gas, biofuels, and electricity for plug-in vehicles, among others.

### Life-Cycle Emissions Inventory

We use life-cycle assessment (LCA) methods to identify and compare the emissions of conventional vehicles, HEVs, PHEVs, and BEVs. LCA provides a systematic inventory and impact assessment of the full environmental implications of products across life-cycle stages: materials extraction and production, manufacturing, use, and the ultimate fate of the product (reuse, recycling, incineration, or land filling). For this study, we estimate emissions of nitrogen oxides ( $\text{NO}_x$ ), sulfur dioxide ( $\text{SO}_2$ ), PM, CO, VOCs, and GHG emissions, including carbon dioxide ( $\text{CO}_2$ ), methane ( $\text{CH}_4$ ), and nitrous oxide ( $\text{N}_2\text{O}$ ). We normalize  $\text{CO}_2$ ,  $\text{CH}_4$ , and  $\text{N}_2\text{O}$  to  $\text{CO}_2$ -equivalence using the 100-y Intergovernmental Panel on Climate Change AR4 global warming potential values adopted by GREET (40). Data for some of these pollutants were not available for some life-cycle stages, as minor emissions are not always reported. For those stages where a specific pollutant is not reported, a value of zero is assumed. The life-cycle boundary includes emissions from vehicle and battery manufacturing (assembly and upstream emissions), energy production (petroleum refinery, electricity generation, and upstream emissions), and the direct emissions from driving (tailpipe and particulates from brake wear).

Allocation of petroleum refinery emissions is based on the energy content of the refinery coproducts. Allocation methods can be important to the results of life-cycle assessment. Often, there are multiple coproducts in a system. In these cases, energy and material consumption as well as wastes and emissions must be allocated among the multiple coproducts. Petroleum refineries are an example of systems where allocation is required. Gasoline, diesel, liquefied petroleum gas, kerosene, and many other products are produced within the refinery boundary. In this study, allocation by energy output is used, which is consistent with prior work on the life cycle of petroleum products (25, 41–43). Allocation by mass, volume, or product supplied is also possible but would not affect the results of this study. Increasingly, system expansion and consequential analysis have been gaining popularity within the life-cycle community. Use of system expansion has been identified to be most important for agricultural systems, where widely different coproducts are produced that may have significant impacts on global markets (see for example ref. 44). Performing an appropriate consequential system expansion analysis requires the use of detailed economic models and/or computable general equilibrium models with associated uncertainties.

Similarly, refinery constraints limit the impacts of changes in coproduct breakdown. A truly consequential analysis would require the use of detailed refinery models that are currently unavailable in the public domain. Hence, refinery product allocation by system expansion is beyond the scope of this paper.

**Vehicle and Battery Manufacturing.** Vehicle and battery manufacturing energy consumption and emissions were evaluated with GREET 2.7a. The model performs a materials-based life-cycle inventory that captures raw material extraction, material processing, manufacturing, and disposal. The materials are evaluated by each vehicle system including body (steel, aluminum, copper/brass, magnesium, glass, plastic, rubber), powertrain system (steel, iron, aluminum, copper/brass, plastic, rubber, perfluorosulfonic acid, carbon paper, polytetrafluoroethylene, platinum), transmission system/gearbox (steel, copper, iron, aluminum, plastic, rubber), chassis (steel, iron, aluminum, copper/brass, plastic, rubber), traction motor (steel, aluminum, copper/brass), generator (steel, aluminum, copper/brass), and electronic controller (steel, aluminum, copper/brass, rubber, plastic). Similar to vehicle components, a materials-based assessment is performed for battery manufacturing, including lead-acid (plastic, lead, sulfuric acid, fiberglass, water), nickel metal hydride (NiMH) (iron, steel, aluminum, copper, magnesium, cobalt, nickel, rare earth metals, plastic, rubber), and lithium ion (Li-ion) (lithium oxide, nickel, cobalt, manganese, graphite/carbon, binder, copper, aluminum, plastics, steel, thermal insulation, electronic parts) chemistries. Lifetime vehicle fluid use is also evaluated, including ethylene glycol (engine coolant), engine oil, power steering fluid, brake fluid, transmission fluid, and methanol (windshield fluid). GREET 2.7a provides the ability to evaluate cars and sport utility vehicles, and the former was chosen for this assessment. Both a conventional internal combustion engine vehicle (CV) and an HEV were evaluated with the HEV used as a proxy for PHEV and BEV base vehicle production, prior to the batteries. For both vehicles, conventional materials were assumed (GREET 2.7a provides the ability to model lightweight materials as well) producing a 3,330 lb weight for the CV and a 2,810 lb weight for the HEV (3,200 and 2,632 lb excluding the batteries).

Although GREET models the CV with a 16-kg lead-acid battery, two alternative battery types were considered for the HEV: a 38-kg NiMH pack and a 15.3-kg Li-ion pack (both producing 23 kW peak battery power). Emissions associated with production of a single battery pack were estimated using GREET, and battery replacement frequency was adjusted as a sensitivity parameter to estimate lifetime emissions. We use the NiMH chemistry for our HEV model. To estimate emissions for the larger battery packs associated with PHEVs and BEVs, which are not available in GREET, we scale the HEV Li-ion battery pack production emissions linearly with pack weight. In particular, the PHEV and BEV designs in GREET use the Saft VL41M cell with a specific energy of 135 Wh/kg (26). We interpolate using reported battery pack energy values (26) to estimate 2010 rated pack capacity as 4.6, 15.9, and 66.1 kWh for the PHEV20, PHEV60, and BEV240, respectively (where  $\text{PHEV}_x$  and  $\text{BEV}_x$  indicate vehicles with battery packs sized for  $x$  km of usable electrical energy). These packs were sized to meet the stated range on the Environmental Protection Agency's urban dynamometer driving schedule (UDDS) (real-world driving conditions will typically result in reduced range; ref. 26). We therefore estimate battery production emissions from PHEV20, PHEV60, and BEV240 by multiplying GREET HEV Li-ion production emissions by 2.23, 7.66, and 31.78, respectively.

Using material inputs, GREET 2.7a evaluates energy inputs and air emission outputs at each life-cycle stage. The results for CV, NiMH-HEV, and Li-ion-HEV are presented in Tables S1–S3. For air emissions, GHGs, VOCs, CO,  $\text{NO}_x$ ,  $\text{PM}_{10}$ ,  $\text{PM}_{2.5}$ , and  $\text{SO}_x$  are reported. Tables S1–S3 summarize the final air emissions per vehicle lifetime. In each table, air emissions results are shown for



battery assembly, battery upstream, vehicle assembly, and vehicle upstream groupings. The assembly life-cycle components are the final stages of manufacturing where processes materials are turned into finished products. The upstream life-cycle components include processing of raw materials into finished materials for assembly. Ultimately, when evaluating the external costs of vehicle manufacturing, emissions from vehicle and battery components are considered separately due to differences in location. Disposal and recycling emissions are excluded from the assessment due to the complexities in material reuse modeling and process uncertainty depending on secondary markets.

GREET 2.7a pulls from the GREET 1.8d fuel-cycle model to evaluate energy consumption emissions (e.g., diesel fuel combustion or electricity generation). GREET 1.8d evaluates electricity generation mixes as the percentage of oil, natural gas, coal, nuclear, biomass, and others, and hydroelectric power is assumed to be represented by the “others” category. Our base case assumes an average US grid mix for emissions associated with power generation supplied to manufacturing and upstream facilities. The low case assumes all electricity is from hydroelectric sources, and the high case assumes all electricity is from coal.

GHG emissions estimates for Li-ion batteries given by GREET are used for our base case for consistency. The GREET estimates are lower than estimates by Zackrisson et al. (45) and higher than estimates by Samaras and Meisterling (20), Majeau-Bettez et al. (46), and Notter et al. (47). Differences in study system boundaries and other input assumptions are likely responsible for the variability in the estimates. We bound these results in our sensitivity analyses through variation of grid mix supply to production facilities. Tables S1–S3 show battery and vehicle assembly and upstream emissions determined from GREET for the three vehicle and battery types of interest. Global warming potential values of 25 for CH<sub>4</sub> and 298 for N<sub>2</sub>O have been used in determining CO<sub>2</sub> equivalence.

**Petroleum Refining.** The well-to-pump emissions of gasoline production are evaluated with the GREET 1.8d fuel-cycle model. GREET provides the ability to model many transportation fuel pathways, and conventional gasoline production is considered in this study. However, gasoline can be produced from a variety of sources including conventional crude and oil sands. GREET specifies that, in 2010, 9.4% of US gasoline is produced from oil sands. Oil sands extraction and processing is significantly more energy and emissions intensive than conventional crude. GREET 1.8d reports that fossil energy requirements are over twice as large for oil sands than conventional crude, greenhouse gas emissions are 1.7 times as large, and other air emissions are up to 1.2 times as large. Three pathways are considered for gasoline production: 9.4%, 0%, and 100% of crude from oil sands, with the remainder from conventional crude in each case. These three scenarios are intended to provide bounds on average and marginal units of oil, which may vary in composition of source by location and over time. The GREET fuel-cycle model includes evaluation from extraction of crude product to processing and distribution of finished gasoline product. For feedstock production, recovery is captured for conventional crude, and bitumen extraction and upgrading (including hydrogen production) are evaluated for oil sands recovery (surface mining and in situ production). The feedstock production phase also includes transport from the recovery sites to US refineries where processing to the finished gasoline product occurs. The fuel refining phase in GREET evaluates refinery energy use and processes, production of additives (if applicable), and final transport and distribution to the pump. GREET 1.8d allows for the customization of several critical input parameters that define the feedstock-to-fuel pathways. A 50/50 mix of surface mining and in situ recovery methods are assumed for oil sands. For hydrogen and steam production in oil sands recovery processes, natural gas is used. A fuel sulfur level of

26 ppm is specified and hydrogen is produced with natural gas in refinery processes. In general, GREET default US parameters for 2010 were used with customization of the share of oil sands products in crude oil feed to refineries. The emissions at each phase are shown in Table S4, with our base case highlighted.

**Electricity Generation.** Air emissions from electricity generation include direct emissions from combustion at the power plant and upstream emissions associated with fuel supply. We estimate direct emissions using the data from the recent NRC report on externalities of energy production (14), which in turn used the Emissions and Generation Resource Integrated Database (48). The NRC report included data on NO<sub>x</sub>, SO<sub>2</sub>, PM<sub>10</sub>, PM<sub>2.5</sub>, and GHGs from coal and natural gas plants, which account for 70% of US electricity generation. These data were reported as mass of pollutant per megawatt hour of electricity generated. We assume optimistically that the remaining 30% of plants produce energy with zero emissions. We also estimate upstream emission factors per unit of coal or natural gas feedstock using GREET, which provides estimates of NO<sub>x</sub>, SO<sub>2</sub>, CO, PM<sub>10</sub>, PM<sub>2.5</sub>, and GHGs from production, processing, and transport of coal and natural gas. These data are reported as mass of pollutant per unit of fuel energy and then converted to a per unit of output basis using the efficiency for individual power plants, as obtained from the NRC power plant data (14). The NRC report did not provide data on CO and VOC emissions from power plants. As a result, CO and VOC emissions from electricity generation in this study only include the CO and VOC emissions from the upstream stages. Electricity generation is a minor source of these pollutants: Less than 1% of national CO emissions and less than 0.5% of national VOC emissions come from power generators (49); the exclusion of direct emissions from power plants is not expected to significantly impact our results.

We compute the average emissions per kilowatt hour generated in the US by weighting emissions from each plant by its production output. Marginal emissions associated with the specific plants that supply marginal PHEV or BEV electricity demand in a particular location and in future scenarios may be higher or lower than the average grid mix. To bound these scenarios, we identify the plants with 5th, 50th, and 95th percentile damage intensity by first computing total externality damages per kilowatt hour generated from each plant, then ordering the plants by damage intensity, and finally selecting the plants associated with the 5th, 50th, and 95th percentile kilowatt hour generated by damage intensity. Because the ordering of plants depends on the value of damages assigned to GHG emissions, we compute 5th, 50th, and 95th percentile plants for each GHG damage value used in the study. Table S5 summarizes the data with our base case highlighted. The 95th percentile plant will not necessarily have higher emissions than the 50th percentile plant for each pollutant, but the overall value of damages from emissions per kilowatt hour from the 95th percentile plant are higher than damages from the 50th percentile plant.

**Vehicle Use.** Emissions from vehicle use depend on vehicle efficiency as well as the portion of propulsion energy powered by electricity vs. gasoline. Whereas CVs and HEVs use only gasoline for propulsion and BEVs use only grid electricity, PHEVs use some of each. After a PHEV battery is fully charged, it will operate in charge-depleting mode (CD mode) until the battery's state of charge drops to a predetermined level, at which point the vehicle switches to charge-sustaining mode (CS mode). Average propulsion energy in CS mode comes entirely from gasoline, and the vehicle operates like an HEV. In CD mode, the vehicle may have an all-electric or a blended control strategy. The all-electric control strategy takes all propulsion energy from the battery pack and consumes no gasoline in CD mode. The blended control strategy permits the vehicle to use some gasoline in CD mode

where useful to improve overall efficiency. The blended strategy also allows smaller battery packs and motors to be used because they need not be sized for peak power demand.

We use midsize vehicle models defined in GREET 1.8d to estimate vehicle efficiency, vehicle emissions, and battery pack size requirements (26). The conventional vehicle is a baseline ICEV, and we do not consider advanced ICEVs in this study. The HEV is a split drivetrain with an NiMH battery and a single planetary gear set, similar to the Toyota Prius. The PHEV20 is a split drivetrain with an Li-ion battery pack sized for enough energy to support 20 km of all-electric travel on the UDDS driving cycle. The vehicle is assumed to have a blended control strategy, so CD-mode range is longer than 20 km, but the electrical system provides energy for 20 km worth of propulsion on the UDDS driving cycle. We use the efficiency values for the GREET PHEV10 (miles) as an estimate of efficiency for the PHEV20 (kilometers) in this study. The PHEV60 is a series drivetrain with an Li-ion battery pack sized to provide enough energy to support 60 km of all-electric travel. The control strategy is all-electric. We use efficiency values for the GREET PHEV40 (miles) as an estimate of efficiency for the PHEV60 (kilometers) in this study. Finally, the BEV has an Li-ion battery pack sized for 240 km (150 mi) of travel.

To estimate the portion of driving propelled by electrical power, we use the 2009 National Household Travel Survey (NHTS), which interviewed over 140,000 people across the US on details of their driving behavior on the day surveyed (50). We extracted data on total daily distance traveled over the survey population, weighted by vehicle to correct for demographic differences in the survey sample, and removed all data points with daily travel distances over 1,000 mi (1,600 km, or less than 0.1% of the data) to avoid some outlier long-trip entries with likely data entry errors. We used the remaining data to calculate the portion of distance that would be traveled in CD vs. CS mode for each vehicle, assuming one charge per day and using vehicle efficiencies estimated in GREET. All trips shorter than the CD-mode range are traveled entirely in CD mode, whereas trips longer than the CD-mode range are traveled partly in CD mode and partly in CS mode. The Argonne report (26) estimates losses associated with real-world driving, so that, even though a PHEV<sub>x</sub> has a battery pack sized for  $x$  km of electric travel on standard test driving cycles, in practice it will experience less than  $x$  km of range due to losses associated with aggressiveness and start-stop conditions of real driving cycles (see ref. 26 for details). For the PHEV20, the CD-mode range is longer than the all-electric range (20 km) despite these losses because gasoline is also used in CD mode. For the PHEV60, the CD-mode range is shorter due to losses, which are particularly pronounced in the series drivetrain. Table S6 summarizes the vehicle characteristics, Fig. S2 shows the effect of NHTS data truncation, and Table S7 summarizes lifetime energy consumption and emissions, with our base case highlighted, using the data in Table S6.

### Air Emissions Externality Valuation

All monetary values in this study were converted to year 2010 US dollars using the Energy Information Administration Gross Domestic Product (GDP) Price Deflator unless otherwise noted (51). To convert the estimated air emissions to cost of damages, the Air Pollution Emission Experiments and Policy (APEEP) analysis model was used. APEEP is designed to calculate the marginal human health and environmental damages corresponding to emissions of PM<sub>2.5</sub>, PM<sub>10</sub>, VOC, NO<sub>x</sub>, and SO<sub>2</sub> on a dollar-per-ton basis (52). The APEEP model evaluates emissions in each US county with its exposure, physical effects, and resulting monetary damages. APEEP evaluates emissions at different release heights: the ground-level subset is used to evaluate emissions from driving, whereas estimates at stack-height elevation are used to evaluate the emissions from electricity generation and petroleum refining. For each county and each pollutant, APEEP esti-

mates mortality, morbidity, and environmental (e.g., visibility, crop loss, forest recreation, timber loss, materials depreciation, etc.) damages. We use APEEP costs with a statistical value of life of \$6 million (\$<sub>2000</sub>) (52). All values in the APEEP model are given in 2000 dollars and were converted to 2010 dollars.

CO valuation is not included in the APEEP model, however, vehicles are the largest source of CO emissions in the US (49). Like PM<sub>10</sub>, CO is primarily linked to cardiovascular effects, followed by secondary effects from ground-level ozone (53, 54). CO valuation costs from Matthews and Lave (55) were employed in this analysis. The median value of \$570/t of CO (\$<sub>1992</sub>) was scaled with the PM<sub>10</sub> valuation costs for each county given in the APEEP model following  $CO_{\text{county}} = CO_{\text{median}} \times (PM_{\text{county}} / PM_{\text{median}})$ . This value is high compared to the range of \$<sub>1991</sub> 10–90/t reported by Delucchi (56). The Matthews and Lave (55) range (\$<sub>1992</sub> 1.1–1,160/t) encapsulates Delucchi's range (56) and is less than CO control costs reported by Wang et al. (57) of \$<sub>1989</sub> 1,550–5340/t with a median of \$<sub>1989</sub> 2,950/t. GHG costs are from the NRC study and based on a literature survey and estimates from the US Interagency Working Group on Social Cost of Carbon (58). Converted to 2010 dollars, the low, medium, and high valuation of GHG emissions are \$14, \$42, and \$140 per metric ton, respectively. These costs are intended to reflect global damages, but marginal damages remain uncertain and could be larger (59). If only US-specific damages are desired, then the Interagency Working Group estimates 7–23% of the global values should be used (58).

**Valuation of Vehicle and Battery Manufacturing Externalities.** The vehicle and battery external cost valuation cases are based on the emissions reported in Tables S1–S3 and their potential release in automobile manufacturing-related counties for assembly and all US counties for upstream processes.

For direct emissions from vehicle and battery assembly, we estimate damages associated with the location of automobile and parts manufacturing counties identified through US census data where vehicle and parts manufacturing occurs. The use of census data, which tags facilities and employees to counties affiliated with vehicle manufacturing sectors, was originally employed by NRC (14). This approach identifies approximately 1,700 unique counties out of the roughly 3,100 in the US. Emissions from each county are weighted by the number of automotive manufacturing employees from that county, and we use the weighted average as a base case. For bounding cases, we multiply the relevant emissions by damage costs for each pollutant in each county (14, 52), order the counties by damage intensity, and take the 5th and 95th percentile weighted county as bounding cases.

Because many of the upstream emissions from vehicle and battery assembly are associated with similar processes to assembly (auto parts manufacturing, etc.), we use the same weighted 1,700 auto manufacturing counties to estimate base case upstream emissions damages. For high and low bounding estimates for upstream damages, emissions are evaluated at all of the 3,100 US counties (unweighted), and the 5th and 95th percentile counties are selected for bounding. Although it is likely that upstream processes occur outside of the US at some point in the global supply chain, the impact potential captured by evaluating all US counties includes counties with very low and high populations, which provides a reasonable estimate for bounds globally.

The APEEP unit cost data (14, 52) does not include valuation of carbon monoxide. CO valuation costs from Matthews et al. (13) were employed and for each case scaled from the median value of \$520 (\$<sub>1990</sub>) based on the PM<sub>10</sub> ratio for the particular case and its median value, as described previously. Case-specific GHG emissions were determined from the valuation literature survey performed by NRC (14). Additionally, for bounding, our low emissions case assumes that the electricity mix used to power the assembly and upstream facilities is zero emissions, whereas the high emissions

case assumes the electricity is from coal. Tables S8–S11 summarize results, with our base case highlighted.

**Valuation of Petroleum Refining Externalities.** Similar to vehicle and battery manufacturing, gasoline production and upstream emission externality valuation are evaluated independently. The gasoline production refinery emissions are evaluated at each of the 135 petroleum refineries in the US based on NRC (14) (this approach was employed in NRC to evaluate both refinery and upstream emissions; we have chosen to evaluate the upstream independently with a different approach). At each of the refineries, the emission externality unit values are multiplied by the emissions “fuel refining” component reported in Table S4, producing a total cost at each location. Refineries are then rank ordered, and the total cost is used to determine the 5th, 50th (median), and 95th percentile cases for gasoline refining. Using the refinery operable capacities, a weighting is determined as the fraction of total US production. The weighting vector for the refineries is multiplied and then summed for each unit externality refinery cost to determine the weighted average case. The 9.4% oil sands crude share is used for the base case and the same approach described is employed when 0% or 100% oil sands cases are evaluated.

Note that the unit costs determined from APEEP for the refinery locations at each case do not change with the percentage of oil sands crude. This result is because the crude entering the refinery is effectively the same. CO<sub>2</sub>e costs (\$<sub>2010</sub>/t) are varied in the GHG valuation scenario at \$14 (low), \$42 (medium, base), \$140 (high), or \$0 (zero).

The values of upstream emissions prior to the petroleum refinery are estimated using several approaches. NRC (14) valued upstream emissions at gasoline refinery locations. This approach is likely an overestimate because gasoline refinery locations are often situated in or near high-population centers, where the fuel is consumed, whereas the upstream emissions for gasoline production can occur anywhere between oil production sites and the refinery. For conventional crude in the US, GREET 1.8d specifies a default of 7% of oil imported from Alaska, 8% from Canada and Mexico, 50% from offshore countries, with the remainder extracted domestically. The challenge of pinpointing where upstream emissions are occurring was managed by evaluating three scenarios. First, the 135 petroleum refinery counties were used but were assumed to overestimate impacts. Second, oil and gas extraction were assumed to occur in the same regions. Sixty percent of natural gas is produced in Louisiana, New Mexico, Oklahoma, Texas, Wyoming, and Colorado (60). The natural gas producing counties in these six states were determined, producing roughly 400 unique US counties for petroleum upstream valuation. Lastly, all 3,100 US counties were evaluated, a likely overestimate because large cities are captured in this sample where upstream processes would not occur. The second approach was chosen as the most representative for capturing the range in upstream locations. Although only US counties are considered, the range includes near-zero impact locations to high-impact locations bounding processes in non-US regions. The unit valuation costs are summarized in Table S13, with our base case highlighted.

**Valuation of Electricity Generation Externalities.** Power plant emission valuation was conducted using data from the NRC report (14). Valuation estimates for each power plant were available for SO<sub>2</sub>, NO<sub>x</sub>, PM<sub>10</sub>, and PM<sub>2.5</sub>. Upstream emissions from the production, processing and transport of coal and natural gas are also included in this analysis. The Energy Information Administration (EIA) maintains county-level coal production data (61), which was used to develop the emission costs of coal production, processing, and transport. EIA does not maintain county-level natural gas production data. County-level natural gas production data from the six top producing states (Louisiana, New Mexico, Oklahoma, Texas, Wyoming, and Colorado) were obtained from

state agencies (62–67) and used to develop the costs from natural gas production, processing, and transport. These total county-level costs were rank ordered, and the 5th and 95th percentile values (based on cumulative production) for the upstream emissions were computed, as shown in Table S14. Notice that, in some cases, the value of an individual pollutant is lower in the 95th percentile value than in the 5th percentile value. The 5th and 95th percentile values were obtained using the total valuation of all pollutants, so individual pollutants may present these characteristics. It should also be noted that, because the upstream emission factors are constant for all the counties, the valuation of GHG emissions does not affect the 5th and 95th percentile values for the criteria air pollutants.

In addition to NO<sub>x</sub>, PM<sub>2.5</sub> (from combustion at the power plant), SO<sub>2</sub>, PM<sub>10</sub>, and CO (for the upstream stages), we developed scenarios at different carbon costs: \$0, \$14, \$42, and \$140 per metric ton of GHG. Bounds were developed for each carbon cost scenario by aggregating the total externality costs (adding the individual pollution costs in a dollar per kilowatt hour basis) of each plant, sorting from lowest to highest, and selecting the 5th, 50th, and 95th percentile kilowatt hour generated. A weighted average plant was estimated using the percentage of electricity generated by each plant. Pollutant valuation numbers can be found in Table S15, with our base case highlighted.

**Valuation of Driving Externalities.** APEEP county-specific valuation data was used to determine high- and low-case scenarios for damages caused by emissions during driving (tailpipe, brake wear, and tire wear). To develop these values, an aggregated total externality value (in dollars per mile) was developed for each county using the emission factors for conventional vehicles shown in Table S7, the counties were ordered by net damage per mile, and the 5th and 95th percentile counties were used to represent low- and high-damage counties, respectively, for all vehicle types. The pollutant valuation estimates used for driving emissions can be seen in Table S16.

### Oil Consumption Valuation

The US oil premium is a measure of some of the major costs to the US associated with oil consumption that are not captured in the commodity price. Leiby (68) identifies three categories of costs associated with the economic cost of importing petroleum into the US: (i) risk caused by potential sudden oil supply disruptions to US economic output, (ii) higher world oil prices resulting from US imports (monopsony), and (iii) the cost of existing oil security policies, such as associated military spending and maintenance of the strategic petroleum reserve. We examine each of these in turn. Leiby (68) cautions that

The oil import premium is an informative measure of long-standing interest, but is not intended to provide complete guidance on oil security policy. The oil premium is not a measure of the full social costs of oil imports or use, or the full magnitude of the oil dependence and security problem. Rather, it is a measure of the quantifiable per-barrel economic costs which the US could avoid by a small-to-moderate reduction in oil imports.

**Supply Disruptions.** Sudden disruptions to the supply of oil have externality effects in the form of (i) reductions in US economic output resulting from higher prices of a necessary commodity, (ii) temporary losses associated with dislocation and lags in reallocation of resources in response to a sudden spike, and (iii) additional wealth transfers to foreign countries due to the spike. These costs are computed by estimating the probability of supply disruptions using historical data and the impact of supply disruption



tions (69). Not all of the corresponding costs are externalities. As Brown and Huntington (69) explain

When buying oil products (or oil-using goods), individuals should recognize that possible oil supply shocks and higher prices could harm them personally. So the expected transfer on the marginal purchase is not an externality. On the other hand, individuals are unlikely to take into account how their purchases may affect others by increasing the size of the price shock that occurs when there is a supply disruption. So the latter portion is an externality.

The externality portion of these effects estimated by Brown and Huntington are shown in Table S17 (69). Leiby estimates these costs for imports at \$2.51–\$9.00/bbl with a medium estimate of \$5.40/bbl (68). We use midpoint average estimates by Brown and Huntington (69) as our base case.

**Market Power.** Because the US is such a large consumer of oil, accounting for 22% of world oil consumption in 2009 (70), US consumption volume has an effect on world oil prices. This effect is not an externality; however, it is an additional cost that the US has the power to control to some degree, because reduction of US imports would reduce the world price of oil, thus reducing the cost paid for remaining imports (exercising this control creates a market distortion and is generally not globally efficient). The level of price reduction depends on assumptions about market responses to reductions in US demand, including reactions by the Organization of the Petroleum Exporting Countries (OPEC). Leiby's range of estimates are \$3.35–\$21.21/bbl, with a medium estimate of \$10.26/bbl (68). We use Leiby's medium estimate as our base case.

Greene (71) also estimates excess losses during a supply disruption due to the market power of OPEC. Although these are not security externalities and do not necessarily reduce US GDP, Greene argues that they are costs to the US, in particular in terms of long-term oil independence, because the world's 10 largest oil companies own 80.6% of the world's proven reserves, and nine of the 10 are state-owned OPEC companies (71). These costs, although large, are not externality costs and are not likely to be substantially changed by marginal changes in US consumption, so we do not count separately the costs of OPEC's ability to exercise market power in our study.

**Oil Security Policy.** Net petroleum and petroleum product imports to the US represented about 52% of total oil consumption in 2009 (72). The US energy security issues associated with petroleum dependence typically include the costs of maintaining the strategic petroleum reserve (SPR), the potential economic threats to US national security, the use of oil supplies as leverage by external states to achieve foreign policy goals, the use of oil revenues by rogue states to pursue policies unfavorable to the US, the use of oil revenues to finance terrorism, and the military costs of defending the transportation of oil from the Persian Gulf (68, 73).

Although costs of maintaining the SPR may be considered part of oil security policy, Leiby (68) states

While the optimal size of the SPR, from the standpoint of its potential influence on US costs during a supply disruption, may be related to the level of US oil consumption and imports, its actual size has not appeared to vary in response to recent changes in the volume of oil imports. Therefore, we adopt the [static SPR] approach and assume no change in the SPR from its current size. However, the role of the SPR in addressing shock effects and reducing disruption costs is explicitly accounted in the estimates.

Additionally, the fiscal year (FY)2010 appropriation to maintain and partially expand the SPR was \$244 million, and the SPR held 727 million barrels of oil (74). Yet, with expansion plans canceled, the FY2011 request is only \$139 million, with the FY2012 request reduced further. The high estimate of SPR maintenance costs are negligible relative to total oil expenditures and consumption. We follow Leiby's approach and ignore direct changes to SPR spending due to marginal changes in oil consumption.

The use of oil supplies as leverage by external states to achieve foreign policy goals, the use of oil revenues by rogue states to pursue policies unfavorable to the US, and the use of oil revenues to finance terrorism are difficult to quantify as damage functions. However, Crane et al. argue that the use of oil supplies as foreign policy coercion has never been successful, due to a global market for oil (73). They also argue that successful terrorist attacks can require very low financial support, so reductions in oil demand alone is unlikely to dramatically reduce this risk. Oil revenues have enhanced the capabilities for some rogue countries to pursue unfavorable policies, however the externality portion of these costs on a barrel of oil has not been estimated in the literature and is an important area for further research.

The US military provides security for oil transit in the Persian Gulf as well as protection of production facilities, oil companies, infrastructure, and regimes friendly to US oil production interests (75). Crane et al. estimated that, if all US military expenditures associated with defending the procurement and transit of imported oil from the Persian Gulf were eliminated, the budgetary savings would range between \$75.5 and \$91 billion (\$<sub>2009</sub>) (73). Delucchi and Murphy (75) estimated the amount the US federal government would be expected to reduce its military commitment in the Persian Gulf if the US highway transportation sector did not use oil as between \$6 and \$25 billion annually, emphasizing that the "analysis is more illustrative than rigorously quantitative." Stern (76) uses a method of cost accounting for force projection in the Persian Gulf, which results in a much higher cost than previous estimates. Although military expenditures associated with oil security are large, marginal changes in oil consumption do not necessarily result in proportional reductions in military spending because military spending is likely a nonlinear function of oil consumption. Delucchi and Murphy (75) argue that marginal costs could be higher than average costs because "if the oil defense cost per gallon is proportional to the price of oil per gallon, then given that the price of oil increases with quantity, the defense cost per gallon will increase with quantity." In contrast, Brown and Huntington (69) argue "the direction of [oil security] policy is not likely to be greatly affected by marginal changes in oil consumption," and the National Research Council (14) argues "it is unlikely that whatever spending is specific to securing the [oil] supply routes would change appreciably for a moderate reduction in oil flowing from that region to the United States. [The National Highway Traffic Safety Administration (NHTSA)] rule making for CAFE standards (41) adopts a similar base case approach. In other words, several works in the literature assume the marginal cost is essentially zero," and "a twenty percent reduction in oil consumption, for example, would likely have little impact on the strategic positioning of military forces in the world." There does not appear to exist definitive data to resolve these views; however, we do not believe that the defense cost per gallon is necessarily proportional to the price of oil per gallon. Rather, we view the primarily nonlinearity as caused by economies of scale and the presence of multiple strategic objectives. Defending a region or supply route that produces even a small amount of oil requires at minimum a substantial level of infrastructure and manpower investment. If the volume of oil passing through the region or route increases slightly, marginal additional support may be required, but this would not likely be proportional to the cost required to set up the minimum initial infrastructure needed to establish a meaningful presence. Nonetheless, it is

likely that the marginal attributable costs of providing security for oil supply lines, although lower than average, is not zero. We adopt Delucchi and Murphy's low estimate of average military costs (75) as our base case estimate of marginal costs, and we examine the full range, including zero marginal cost, in sensitivity.

**Net oil Premium.** Table S18 summarizes coproduct output from petroleum refineries in the United States. To compute the value of the oil premium to be allocated to gasoline, it is possible to conduct a system expansion to estimate the change in oil consumption in the United States caused by a reduction in gasoline consumption and the relevant effects to global oil markets, production, and consumption. This consequential analysis has been proposed by some in the life-cycle community, however its use is not agreed upon, and there are several arguments about when it is appropriate to perform consequential analysis (77). We encourage such analysis. Absent availability of such an assessment, however, it is common in life-cycle assessment studies to allocate upstream factors to downstream coproducts by mass, volume, energy, or economic value of the coproduct outputs (43). Table S18 computes allocation of the oil premium, in dollars per barrel of oil, to each coproduct output, in cents per gallon, on a mass, energy, and volumetric basis. Results for gasoline are similar across all three allocation approaches, and we select energy allocation.

Table S20 summarizes the supply disruption, monopsony, and military estimates of the oil premium using the energy-based allocation to gasoline. We use the medium estimate as our base case and examine the range in sensitivity analysis.

### Vehicle Ownership Cost

We adopt the vehicle cost estimates for years 2015 and 2030 from the Argonne National Labs 2009 report on transportation futures (28), which consist of (i) estimates based on literature review and interviews with experts and (ii) targets set by the Department of Energy. The Argonne report calls the DOE targets "very optimistic." The report estimates costs associated with a variety of subsystems and assumes that retail prices are 1.5 times costs for all vehicles. Relevant factors are summarized in Table S19 with our base case highlighted. The range of price premium associated with BEVs in the ANL report span the range of estimates reviewed in ref. 6.

For use-phase energy costs, we use maximum, minimum, and average costs from 2008–2010 from the EIA. Lifetime operating costs are calculated using a nominal discount rate of  $r_N = 8\%$  and assuming annual inflation price increases of  $r_I = 3\%$ , resulting in a real discount rate of  $r_R = 4.9\%$ .

For scheduled maintenance costs, we adopt estimates from Oak Ridge National Laboratory, based on prior estimates from EPRI, and we assume lifetime maintenance costs are divided evenly over the 12 y of vehicle life in order to compute net present value (78). These estimates, summarized in Table S22, are within the range of those reviewed in ref. 6.

Charger costs were estimated based on examination of unpublished data on charger installation costs from Idaho National Laboratory, Duke Energy, Coulomb Technologies, and Clean Fuel Connections. We examine only the cost of level-2 chargers because the difference in cost for installing a level-1 vs. level-2 circuit is small enough that consumers who need to install a new circuit are likely to select level 2 in many cases. We ignore the cost of workplace and public charging infrastructure and assume that all drivers charge only at home, which may underestimate costs, especially for BEVs which depend on charger availability. We assume that BEV and PHEV60 drivers will install new level-2 charging infrastructure at home to provide a sufficient charging rate to fully charge the battery overnight. We assume that half of PHEV20 drivers will use already-existing level-1 outlets at their home parking location and will not require new charging infra-

structure (because level 1 provides a sufficient rate to charge the smaller battery pack in the PHEV20), whereas the other half install new level-2 lines (although level 1 is sufficient, new installations are likely to be level 2 because difference in new installation cost between level 1 and level 2 is typically small). Costs vary substantially if installation is in a single family home vs. multiunit dwelling, if an attached or detached garage or carport is present, whether an electrical panel upgrade is needed, and how much trenching, boring, concrete, and stucco work is required to complete the installation. Our assumed costs, summarized in Table S23, are intended only as a rough estimate, and more work is needed to assess average and variation in future costs of charging equipment and installation.

### Detailed Results

**Base Case.** Our base case scenario is defined in Table S24. US average values are used for electricity grid mix, refinery direct and upstream emissions, manufacturing direct and upstream emissions, manufacturing electricity source, vehicle driving location, and gasoline and electricity prices. The medium estimate for GHG damages is used. GREET vehicle characteristics for 2010 are used, and batteries are assumed to last the life of the vehicle. The 5% best location for electricity upstream is assumed because upstream emissions from electricity are believed to be released primarily in locations farther from population centers (this assumption has a negligible effect on results). We assume 9.4% of oil supply is from oil sands because this is the current US average reported in GREET. Literature review vehicle costs for 2015 and medium estimates of the oil premium are used.

Air emissions and oil premium costs for this scenario are listed in Table S25 and displayed graphically in Figs. S3–S5. In the base case, a large portion of emissions damages are associated with vehicle operation and emissions associated with battery production are significant for BEVs. The majority of damages are caused by GHGs and SO<sub>2</sub> releases. Plug-in vehicles operating in all-electric mode produce no tailpipe emissions but still emit PM in tire and brake wear, thus the vehicle operation phase is not zero. SO<sub>2</sub> is currently capped under US law, which means that releases associated with charging electrified vehicles may be shifted from other potential demand rather than newly created. As such, it is possible that costs associated with charging PHEVs are related to compliance costs (e.g., costs to retrofit plants, shift to low-sulfur coal, or shift loads in order to comply with regulation) rather than new damages. These costs are not captured in current permit prices, which are low due to a nonbinding cap. As the cap is reduced, compliance costs will increase. The act of shifting loads to comply with emission caps may increase or decrease damages, depending on where the emissions are moved. Tracking down these shifts would be difficult. Despite these caveats, our base case provides a reasonable estimate of damages associated with the average production of electricity in the US today, and damages and compliance costs of marginal electricity production are bounded by our sensitivity cases.

Tailpipe emissions factors from GREET used in this study do not account for increases in emissions that occur over the vehicle life due to wear, poor maintenance, or deliberate tampering. Because emissions associated with electricity production are easier to police than tailpipe emissions, it is expected that average tailpipe emissions in a fleet of vehicles will be higher than those estimated based on new vehicles, depending on future laws and enforcement; however, what factor of increase is relevant and how it may vary by location and by powertrain type is not obvious. Beaton et al. (79) used on-road measurements to identify vehicles that fail emission control inspection tests (due to deliberate or unintentional tampering or missing equipment) as contributing the lion's share of emissions. Accounting for such phenomena may improve relative benefit of plug-in vehicles. Similarly, battery degradation affects electrical charge and discharge efficiency and



battery power and energy capabilities over time. These effects increase electricity consumption, decrease the electrical range of vehicles, and increase the portion of trips powered by gasoline; however, these effects are likely smaller than potential increases in tailpipe emissions unless strict regulation and enforcement reduce aging issues with gasoline-powered vehicles. We leave assessment of these age-, maintenance-, and tampering-related factors for future work.

Damages associated with base vehicle production are significant but are relatively constant across vehicle types. Damages associated with battery production are significant for large battery packs in the PHEV60 and BEV240. These damages, based on GREET data, are somewhat lower than estimates from Zackrisson et al. (45) and higher than estimates from Samaras and Meisterling (20), Majeau-Bettez et al. (80), and Notter et al. (47). We use GREET as our base case for consistency and examine lower production emissions in a sensitivity analysis. Gasoline production emissions and tailpipe emissions are larger for conventional vehicles, and electricity production emissions are larger for plug-in vehicles. The majority of air emission damages from each source are caused by GHGs and SO<sub>2</sub>; however, CO and PM have nonnegligible impact for tailpipe emissions, and PM is also important in manufacturing. The APEEP model uses a simple approach to account for secondary PM formation from VOCs (52) that recent research suggests may underestimate the secondary PM formed from motor vehicles by a factor of 10 (81). Such an increase would be significant but would not change our key conclusions.

In our base case, we consider US-specific oil premium costs together with global externality costs of GHG emissions (other air emissions costs are specific to the US, but this captures the vast majority of global damages from US emissions). Although this framing would not offer a consistent scope for a social cost-benefit analysis, we present it as the most relevant case for considering additional costs above ordinary prices that the US may wish to mitigate. In a US-specific accounting frame, the price of GHG emissions would be reduced. The interagency working group estimates that 7–23% of global damages from GHGs would occur in the US (58), thus the component of costs attributed to GHGs would be reduced by 77–93%. Such a frame would not account for global GHG damages caused by US actors. In a global accounting frame, costs to the US associated with transfers to foreign countries, such as those represented in the monopoly premium, would not be included, but benefits to and costs borne by other countries as a result of US oil consumption would need to be included. Such a frame would ignore many US financial interests of reducing petroleum consumption. Use of either of these frames would be expected to reduce the differences between the vehicle alternatives examined and further strengthen our key conclusions. We include global costs of GHG emissions and US-specific oil premium costs in our base case to express global interest in emissions damage reduction but national interest in economic losses due to oil consumption. Our sensitivity cases examine a range of GHG and oil premium costs that encompass alternative framings.

Ownership costs include the cost of purchasing the initial vehicle and battery, purchasing replacement batteries as needed over the vehicle life, purchasing fuel to operate the vehicle over its life, purchasing a charger (if relevant), and paying for scheduled maintenance. Table S26 summarizes these costs for the base case, using an 8% nominal discount rate plus 3% inflation for future gasoline and electricity purchases over a 12-y life. Our base case assumes that the battery lasts the life of the vehicle, so battery replacement costs are zero (lead-acid starter battery replacements are ignored). Fig. S6 summarizes these ownership costs plus emissions damages. Net costs of the CV, HEV, and PHEV20 are comparable, whereas vehicles with larger battery packs come at substantially higher cost.

**Sensitivity Analysis.** Fig. S7 summarizes a sensitivity analysis for a series of univariate parametric studies for life-cycle air emissions and oil premium costs. The base case is repeated on the left for reference, and the remaining cases show how much net increase or decrease is observed by each scenario. Power plant cases (grid mix) have a substantial impact on emissions associated with electrified vehicles. Whereas an average grid mix predicts about a \$1,000 increase in air emission and oil premium costs over the life for BEVs above those of HEVs, these BEV costs could be \$1,000 lower than HEV if electricity comes from hydroelectric sources or \$4,000 higher than HEV if electricity comes from coal. Across these cases, potential air emission and oil premium cost reduction from electrification beyond HEVs is small compared with lifetime ownership costs. If GHG emissions are valued at high (\$140/t) or low (\$14/t) levels, these costs change considerably and trends are amplified; however, differences in lifetime air emission and oil premium costs across electrified vehicles remain within \$2,000 over the life. The discount rate, which represents the rate consumers might apply to value future fees incurred from hypothetical (Pigovian) taxes on air emission externalities plus oil premium fees, also affects overall cost, with high discount rates favoring conventional and low discount rates favoring electrified vehicles. Urban driving locations, high-damage refinery locations, and higher estimates of oil disruption and monopoly premiums also improve benefits of electrification, whereas shorter battery life makes electrification worse, and varying the grid mix used to power manufacturing facilities could increase or decrease emissions associated with electrified vehicles. The remaining sensitivity cases have little effect on comparison of emissions damages across vehicles, and, across all cases, the air emission and oil premium cost reduction potential of plug-in vehicles compared to HEVs is small (or negative) compared with the cost of ownership.

Fig. S8 summarizes sensitivity analysis for a series of univariate parametric studies for net present value of lifetime ownership costs plus air emissions externality and oil premium costs. Most cases that primarily increase or decrease damages have little effect on overall cost comparisons. Reduced battery life significantly increases the cost of vehicles with large battery packs. Reduced vehicle costs, increased gasoline costs, and low discount rates create more favorable conditions for electrified vehicles. Electricity prices have little effect on lifetime costs.

We have not explicitly included a shorter-range BEV alternative in the sensitivity analysis for several reasons: First, shorter ranges for BEVs cover a smaller portion of the distribution of NHTS daily trips, so the assumption of constant driving patterns is weaker for shorter-range BEVs, and allocation of these vehicles to a specific subset of drivers and/or trips is necessary to understand their impact because they cannot function as full replacements for all primary vehicles. This limitation exists to some degree with all BEVs, but the assumption that each vehicle is allocated to an “average driver” from the NHTS data is weaker for short-range BEVs. Additionally, we aim to be consistent with our use of data sources across all vehicle types, and the ANL data are based on only one BEV with a 150-mi (240-km) pack. Shorter-range BEVs can be expected to have impact that is bounded by longer-range BEVs and the PHEV60, less its gasoline-associated impact.

We do not address externalities associated with noise and water pollution. Estimates of the value of noise and water pollution from transportation do exist in the literature (3, 5, 82), but these estimates are not sufficient to capture implications over the entire life cycle (including refineries, power plants, factories, and upstream implications), nor do they provide sufficient resolution to differentiate between the powertrain alternatives or geographic variation in this study. Litman and Doherty (82) estimate noise costs at \$0.011/mi (\$<sub>2007</sub>) for an average car vs. \$0.004/mi for an electric car on an average driving time and location. At these rates, an electric vehicle could provide about \$800 of additional benefit over the life at our base discount rate, but this

estimate does not include noise costs from power plants, refineries, factories, and other upstream factors, and it is not clear how much noise reduction value HEV and PHEVs may offer. Water pollution can also be significant. Litman and Doherty (82) estimate that water pollution costs from oil (including crankcase oil, transmission, hydraulic, brake fluid, and antifreeze) are at least \$0.014/mi for conventional vehicles and may be cut in half for electric vehicles. This estimate provides another \$800 of potential benefit but again does not account for water pollution from refineries, power plants, factories, or other upstream locations.

### Conclusions and Policy Implications.

The findings in this study suggest that, using US average estimates, damages from life-cycle emissions of BEVs and PHEVs with large battery packs may be larger than damages from HEVs and PHEVs with small battery packs due largely to GHG and SO<sub>2</sub> emissions from electricity and battery production. Even if future marginal grid mix and battery manufacturing processes have lower emissions than today's averages, emission damage reduction potential of plug-in vehicles is small compared with ownership cost, and Pigovian taxes designed to correct for externality damages would not be expected to provide much leverage for driving the adoption of plug-in vehicles. Likewise, oil premium costs associated with gasoline consumption are significant, yet differences in these costs among vehicle alternatives remain small compared to differences in lifetime ownership costs. Therefore, electrified vehicles must offer a competitive cost of ownership before they can provide a socially efficient alternative in the United States.

BEVs have the potential to offer the greatest reduction in air emission and oil premium costs at a competitive cost of ownership if vehicle costs drop substantially, gasoline prices rise, emissions from power generation are reduced, and batteries are improved to last the life of the vehicle. As such, continued research to reduce battery cost and policy to reduce emissions from power generation are warranted. However, there is no guarantee that the necessary technical, economic, and political factors will align to achieve this optimistic future, and, in a pessimistic case, BEVs could cause more damages at substantially higher costs. In contrast, HEVs and PHEVs with small battery packs provide meaningful reductions in emission damages and oil premium costs at low (or no) additional lifetime ownership costs compared to conventional vehicles. These vehicles offer a more robust strategy to reducing emissions in the short term at lower cost and lower risk of paying high cost only to end up increasing life-cycle damages. For a given level of social spending, more damage reduction can be achieved by funding adoption of HEVs and PHEV20s than by subsidizing a smaller number of PHEV60s and BEVs. It is likely that advanced high-fuel-economy conventional vehicles, which were not examined in this study, also provide externality reductions at competitive costs. In the future, if there are sufficient decreases in battery costs, increases in gasoline prices and battery life, and reductions of emissions from the electricity grid, then policy to en-

courage adoption of vehicles with larger battery packs may be justified. Until then, it seems that policy focused on social welfare would be more efficient by encouraging adoption of HEVs and small-capacity PHEVs combined with policy to reduce grid emissions and support research to reduce the cost of batteries for all electrified vehicles. Of course, policies that address externalities directly (e.g., carbon taxes, cap and trade policy, and gasoline taxes) have the added benefit of encouraging consumers to purchase smaller vehicles and reduce driving, which would have benefits outside the scope of our study.

These US-specific results may not hold in other countries. For example, it is possible that in some European countries, the combination of higher gasoline prices, lower-emission electricity grid mix, greater population density (with associated emissions damage implications), greater use of diesel instead of gasoline (with associated particulate emissions), and shorter driving distances could make plug-in vehicles more attractive both for ownership costs and damage reduction, and emissions damage reduction potential could be larger in comparison to differences in ownership costs. Additionally, the externality study presented here examines only economic efficiency and does not assess equity, distributional impact, or social and environmental justice. It is possible that some policies may be warranted to manage issues with fairness in distribution of damages, rather than simply reducing damages to economically efficient levels. We also do not examine other externalities, such as congestion and accident rates, that may be affected by changes in driving behavior due to differences in vehicles (lower operating cost, reduced range, etc.).

There are several arguments that might be made for supporting adoption of BEVs and PHEVs with large battery packs despite these results. These may include the potential for greatly increased tailpipe emissions from poorly maintained vehicles or a desire for strategic positioning in the face of anticipated possible futures that may include oil scarcity, significantly higher oil prices, anticipated higher probability of supply disruptions than estimated, anticipated breakthrough battery technology, and shifts in geopolitical factors. For instance, there is concern that if shifts to electrified vehicles are in fact inevitable due to oil scarcity, development of intellectual property related to vehicle electrification within the US could position the US more favorably to compete in future markets. Also, electrified vehicles provide a mechanism for shifting away from consumption of foreign oil to consumption of domestic electricity without some of the potential difficulties in trade negotiations that would be caused by more direct efforts to shift the trade deficit. These shifts could potentially create more US jobs and could have value to the US; however, the benefits of such efforts have yet to be quantified and weighed against costs. It is our hope that the study presented here will encourage further studies to quantify such potential strategic benefits and will sharpen the discussion about the value of potential benefits of vehicle electrification and rational, strategic policy responses.

- Small KA, Kazimi C (1995) On the costs of air-pollution from motor-vehicles. *J Transp Econ Policy* 29:7–32.
- Mayeres I, Ochelen S, Proost S (1996) The marginal external costs of urban transport. *Transport Res D-Tr E* 1:111–130.
- Maddison D, et al. (1996) *Blueprint 5: The True Costs of Road Transport* (Earthscan Publ Ltd, London).
- McCubbin D, Delucchi M (1999) The health costs of motor-vehicle-related air pollution. *J Transp Econ Policy* 33:253–286.
- Delucchi MA, Lipman TE (2001) An analysis of the retail and lifecycle cost of battery-powered electric vehicles. *Transport Res D-Tr E* 6:371–404.
- Delucchi M, Lipman T (2010) Lifetime cost of battery, fuel-cell, and plug-in hybrid electric vehicles. *Electric and Hybrid Vehicles: Power Sources, Model, Sustainability, Infrastructure and the Market*, ed Pistoia G (Elsevier, Amsterdam), pp 19–60.
- Lipman TE, Delucchi MA (2006) A retail and lifecycle cost analysis of hybrid electric vehicles. *Transport Res D-Tr E* 11:115–132.
- Delucchi M (2004) Summary of the nonmonetary externalities of motor-vehicle use. *The Annualized Social Cost of Motor-Vehicle Use in the United States, Based on 1990–1991 Data* (Inst Transportation Studies, Univ of California, Davis, CA).
- Sen AK, Tiwari G, Upadhyay V (2010) Estimating marginal external costs of transport in Delhi. *Transp Policy* 17:27–37.
- Mashayekh Y, Jaramillo P, Chester M, Hendrickson C, Weber C (2011) Costs of automobile air emissions in US metropolitan areas. *Transp Res Record* (in press).
- Hill J, et al. (2009) Climate change and health costs of air emissions from biofuels and gasoline. *Proc Natl Acad Sci USA* 106:2077–2082.
- Thomas CES (2009) Transportation options in a carbon-constrained world: Hybrids, plug-in hybrids, biofuels, fuel cell electric vehicles, and battery electric vehicles. *Int J Hydrogen Energy* 34:9279–9296.
- Matthews HS, Hendrickson CH, Horvath A (2001) External costs of air emissions from transportation. *J Infrastruct Syst* 7:13–17.
- Committee on Health Environmental and Other External Costs and Benefits of Energy Production and Consumption and National Research Council (2010) *Hidden Costs of Energy: Unpriced Consequences of Energy Production and Use* (Natl Acad Press, Washington, DC).
- Chester MV, Horvath A, Madanat S (2010) Comparison of life-cycle energy and emissions footprints of passenger transportation in metropolitan regions. *Atmos Environ* 44:1071–1079.

16. Parry IWH, Walls M, Harrington W (2007) Automobile externalities and policies. *J Econ Lit* 45:373–399.
17. Parry IWH (2009) *How Much Should Highway Fuels Be Taxed?* (Resources for the Future, Washington, DC).
18. Lipman T, Delucchi M (2010) Expected greenhouse gas emission reductions by battery, fuel cell, and plug-in hybrid electric vehicles. *Electric and Hybrid Vehicles: Power Sources, Model, Sustainability, Infrastructure and the Market*, ed Pistoia G (Elsevier, Amsterdam), pp 113–153.
19. Electric Power Research Institute, National Resources Defense Council, and Charles Clark Group (2007) *Environmental Assessment of Plug-in Hybrid Electric Vehicles* (Electric Power Research Institute, Palo Alto, CA).
20. Samaras C, Meisterling K (2008) Life cycle assessment of greenhouse gas emissions from plug-in hybrid vehicles: Implications for policy. *Environ Sci Technol* 42:3170–3176.
21. Bradley TH, Frank AA (2009) Design, demonstrations and sustainability impact assessments for plug-in hybrid electric vehicles. *Renew Sust Ener Rev* 13:115–128.
22. Siohansi R, Denholm P (2009) Emissions impacts and benefits of plug-in hybrid electric vehicles and vehicle-to-grid services. *Environ Sci Technol* 43:1199–1204.
23. Thompson T, Webber M, Allen D (2009) Air quality impacts of using overnight electricity generation to charge plug-in hybrid electric vehicles for daytime use. *Environ Res Lett* 4:014002.
24. Peterson SB, Whitacre JF, Apt J (2011) Net air emissions from electric vehicles: the effect of carbon price and charging strategies. *Environ Sci Technol* 45:1792–1797.
25. US Department of Energy (2010) *The Greenhouse Gases, Regulated Emissions, and Energy Use in Transportation (GREET) Model, versions 1.7, 1.8d and 2.7a* (Argonne Natl Lab, US Dept Energy, Washington, DC).
26. Elgowainy A, et al. (2010) *Well-to-Wheels Analysis of Energy Use and Greenhouse Gas Emissions of Plug-in Hybrid Electric Vehicles*. (Argonne Natl Lab, US Dept Energy).
27. Kromer M, Heywood J (2007) *Electric Power Trains: Opportunities and Challenges in the US Light-Duty Vehicle Fleet* (Sloan Automotive Lab, MIT, Boston).
28. Plotkin S, Singh M (2009) *Multi-Path Transportation Futures Study: Vehicle Characterization and Scenario Analysis* (Argonne Natl Lab, US Dept Energy).
29. Scott MJ, Kinter-Meyer M, Elliot D, Warwick WM (2007) *Impacts Assessment of Plug-in Hybrid Vehicles on Electric Utilities and Regional US Power Grids, Part 2: Economic Assessment* (Pacific Northwest Natl Lab, Richland, WA).
30. Lemoine D, Kammen D (2009) Addendum to an innovation and policy agenda for commercially competitive plug-in hybrid electric vehicles. *Environ Res Lett* 4:039701.
31. Lemoine D, Kammen D, Farrell A (2008) An innovation and policy agenda for commercially competitive plug-in hybrid electric vehicles. *Environ Res Lett* 3:014003.
32. Shiau CSN, et al. (2010) optimal plug-in hybrid electric vehicle design and allocation for minimum life cycle cost, petroleum consumption, and greenhouse gas emissions. *J Mech Design* 132:091013.
33. Karplus VJ, Palteev S, Reilly JM (2010) Prospects for plug-in hybrid electric vehicles in the United States and Japan: A general equilibrium analysis. *Transport Res A Pol* 44:620–641.
34. Shiau CSN, Samaras C, Hauffe R, Michalek JJ (2009) Impact of battery weight and charging patterns on the economic and environmental benefits of plug-in hybrid vehicles. *Energy Policy* 37:2653–2663.
35. Committee on Assessment of Resource Needs for Fuel Cell and Hydrogen Technologies and National Research Council (2010) *Transitions to Alternative Transportation Technologies—Plug-In Hybrid Electric Vehicles*. (Natl Acad Sci, Washington, DC).
36. Silva C, Ross M, Farias T (2009) Evaluation of energy consumption, emissions and cost of plug-in hybrid vehicles. *Energy Convers Manage* 50:1635–1643.
37. van Vliet OPR, Kruijthof T, Turkenburg WC, Faaij APC (2010) Techno-economic comparison of series hybrid, plug-in hybrid, fuel cell and regular cars. *J Power Sources* 195:6570–6585.
38. Lutsey N, Sperling D (2009) Greenhouse gas mitigation supply curve for the United States for transport versus other sectors. *Transport Res D-Tr E* 14:222–229.
39. Kammen D, Arons S, Lemoine D, Hummel H (2009) Cost-effectiveness of greenhouse gas emissions reductions from plug-in hybrid vehicles. *Plug-In Electric Vehicles: What Role for Washington?*, ed Sandalow D (Brookings Inst Press, Washington, DC).
40. Solomon S, et al., eds (2007) *Contribution of Working Group I to the Fourth Assessment Report of the Intergovernmental Panel on Climate Change* (Cambridge Univ Press, Cambridge, UK).
41. National Highway Traffic Safety Administration (2010) *Final Regulatory Impact Analysis, Corporate Average Fuel Economy for MY2012-MY2015 Passenger Cars and Light Trucks* (Natl Highway Traffic Safety Admin, US Dept Transportation, Washington, DC).
42. Venkatesh A, Jaramillo P, Griffin WM, Matthews HS (2010) Uncertainty analysis of life cycle greenhouse gas emissions from petroleum-based fuels and impacts on low carbon fuel policies. *Environ Sci Technol* 45:125–131.
43. Wang M, Lee H, Molburg J (2004) Allocation of energy use in petroleum refineries to petroleum products—implications for life-cycle energy use and emission inventory of petroleum transportation fuels. *Int J Life Cycle Ass* 9:34–44.
44. Kaufman AS, Meier PJ, Sinistore JC, Reinemann DJ (2010) Applying life-cycle assessment to low carbon fuel standards—how allocation choices influence carbon intensity for renewable transportation fuels. *Energy Policy* 38:5229–5241.
45. Zackrisson M, Avellan L, Orlenius J (2010) Life cycle assessment of lithium-ion batteries for plug-in hybrid electric vehicles—critical issues. *J Clean Prod* 18:1519–1529.
46. Majeau-Bettez G, Hawkins TR, Stromman AH (2011) Life cycle environmental assessment of lithium-ion and nickel metal hydride batteries for plug-in hybrid and battery electric vehicles. *Environ Sci Technol* 45:4548–4554.
47. Notter DA, et al. (2010) Contribution of Li-ion batteries to the environmental impact of electric vehicles. *Environ Sci Technol* 44:6550–6556.
48. US Environmental Protection Agency (2007) *EGRID Emission Data for 2005*. (Clean Energy Office, US Envir Protect Agency, Washington, DC).
49. US Environmental Protection Agency (2008) *National Emission Inventory Air Pollutant Emissions Trends*. (US Environmental Protection Agency, Washington, DC).
50. US Department of Transportation (2009) *National Household Travel Survey* (US Dept Transportation, Washington, DC).
51. US Department of Commerce, Bureau of Economic Analysis, and US Energy Information Administration (2010) *Implicit Price Deflator, 1949–2009* (US Dept Commerce, Washington, DC).
52. Muller NZ, Mendelsohn R (2007) Measuring the damages of air pollution in the United States. *J Environ Econ Manag* 54:1–14.
53. US Environmental Protection Agency (2009) *Integrated Science Assessment for Particulate Matter* (US Environmental Protection Agency, Washington, DC).
54. US Environmental Protection Agency (2011) *An introduction to indoor air quality (IAQ): Carbon monoxide* (US Environmental Protection Agency, Washington, DC).
55. Matthews HS, Lave LB (2000) Applications of environmental valuation for determining externality costs. *Environ Sci Technol* 34:1390–1395.
56. Delucchi MA (2000) Environmental externalities of motor-vehicle use in the US. *J Transp Econ Policy* 34:135–168.
57. Wang MQ, Santini DJ, Warinner SA (1994) *Methods of valuing air pollution and estimated monetary values of air pollutants in various US regions* (Argonne Natl Lab, US Dept Energy).
58. US Interagency Working Group on Social Cost of Carbon (2010) *Technical Support Document: Social Cost of Carbon for Regulatory Impact Analysis Under Executive Order 12866* (US Government, Washington, DC).
59. Kopp RE, Mignone BK (2011) The U.S. Government's Social Cost of Carbon Estimates After Their First Year: Pathways for Improvement. *Economics*, No. 2011–16.
60. US Energy Information Administration (2010) *Natural Gas Annual 2008* (US Dept Energy, Washington, DC).
61. US Energy Information Administration (2010) *Annual Coal Report 2008* (US Dept Energy, Washington, DC).
62. Colorado Oil and Gas Information System (2010) *Colorado Oil and Gas Information System (COGIS)* (Denver). Available at <http://cogcc.state.co.us/cogis>. Accessed October 5, 2010.
63. Louisiana Department of Natural Resources (2010) *Strategic Online Natural Resources Information System*. Available at <http://www.sonris.com>. Accessed October 5, 2010.
64. New Mexico Energy, Minerals and Natural Resources Department: Oil Conservation Division (2010) *Well Search Application*. Available at <http://www.emnrd.state.nm.us/ocd>. Accessed October 5, 2010.
65. Railroad Commission of Texas (2010) *RRC Online System*. Available at <http://webapps.rrc.state.tx.us>. Accessed October 5, 2010.
66. Soltani, C (2010) *2009 Report on Oil and Natural Gas Activity within the State of Oklahoma* (Oklahoma Corp Commission, Technical Services Department: Oil and Gas Conservation Division, Oklahoma City). Available at [http://www.occeweb.com/og/2010og\\_report.pdf](http://www.occeweb.com/og/2010og_report.pdf). Accessed October 5, 2010.
67. Wyoming Oil and Gas Conservation Commission (2010) *Oil and Natural Gas Production*. Available at <http://wogcc.state.wy.us>. Accessed October 5, 2010.
68. Leiby P (2007) *Estimating the Energy Security Benefits of Reduced US Oil Imports* (Oak Ridge Natl Lab, Washington, DC).
69. Brown, Huntington H (2010) *Estimating US Oil Security Premiums* (Resources for the Future, Washington, DC).
70. US Energy Information Administration (2010) *November 2010 International Petroleum Monthly* (US Dept Energy, Washington, DC).
71. Greene DL (2010) Measuring energy security: Can the United States achieve oil independence? *Energy Policy* 38:1614–1621.
72. US Energy Information Administration (2010) *Annual Energy Review 2009* (US Dept Energy, Washington, DC).
73. Crane K, et al. (2009) *Imported Oil and US National Security* (RAND Corp, Santa Monica, CA).
74. Andrews A, Pirong R (2011) *The Strategic Petroleum Reserve and Refined Product Reserves: Authorization and Drawdown Policy* (Congressional Research Service, Washington, DC).
75. Delucchi MA, Murphy JJ (2008) US military expenditures to protect the use of Persian Gulf oil for motor vehicles. *Energy Policy* 36:2253–2264.
76. Stern RJ (2010) United States cost of military force projection in the Persian Gulf, 1976–2007. *Energy Policy* 38:2816–2825.
77. Finnveden G, et al. (2009) Recent developments in life cycle assessment. *J Environ Manage* 91:1–21.
78. Cleary T, et al. (2010) *Plug-In Hybrid Electric Vehicle Value Proposition Study* (Oak Ridge Natl Lab and Sentech, Oakridge, TN).
79. Beaton SP, et al. (1995) On-road vehicle emissions—regulations, costs, and benefits. *Science* 268:991–993.
80. Majeau-Bettez G, Hawkins TR, Stromman AH (2011) Life cycle environmental assessment of lithium-ion and nickel metal hydride batteries for plug-in hybrid and battery electric vehicles. *Environ Sci Technol* 45:4548–4554.
81. Robinson AL, et al. (2007) Rethinking organic aerosols: Semivolatile emissions and photochemical aging. *Science* 315:1259–1262.
82. Litman T, Doherty E (2009) *Transportation Cost and Benefit Analysis: Techniques, Estimates and Implications* (Victoria Transport Policy Institute, Victoria, BC, Canada), 2nd Ed.











**Table S1. Lifetime emissions (grams) summary for an ICEV with a lead-acid battery**

|                                         | Battery assembly | Battery upstream | Vehicle assembly | Vehicle upstream | Total     |
|-----------------------------------------|------------------|------------------|------------------|------------------|-----------|
| <b>Base case (US avg grid mix)</b>      |                  |                  |                  |                  |           |
| CO <sub>2</sub>                         | 326,472          | 31,939           | 927,115          | 6,299,055        | 7,584,582 |
| CH <sub>4</sub>                         | 440              | 101              | 1,582            | 11,032           | 13,154    |
| N <sub>2</sub> O                        | 4.6              | 0.4              | 13               | 70               | 88        |
| CO <sub>2</sub> e                       | 338,837          | 34,572           | 970,605          | 6,595,582        | 7,939,596 |
| VOC                                     | 29               | 7.2              | 1,817            | 31,166           | 33,019    |
| CO                                      | 87               | 18               | 362              | 39,473           | 39,941    |
| NO <sub>x</sub>                         | 356              | 59               | 2,100            | 9,495            | 12,009    |
| PM <sub>10</sub>                        | 430              | 119              | 1,511            | 11,039           | 13,099    |
| PM <sub>2.5</sub>                       | 113              | 44               | 560              | 4,494            | 5,211     |
| SO <sub>x</sub>                         | 782              | 446              | 2,945            | 17,812           | 21,985    |
| <b>Low case (hydroelectric supply)</b>  |                  |                  |                  |                  |           |
| CO <sub>2</sub>                         | 0                | 20,758           | 500,209          | 4,462,802        | 4,983,768 |
| CH <sub>4</sub>                         | 0                | 86               | 785              | 8,528            | 9,398     |
| N <sub>2</sub> O                        | 0                | 0.2              | 4.8              | 43               | 48        |
| CO <sub>2</sub> e                       | 0                | 22,972           | 521,271          | 4,688,758        | 5,233,001 |
| VOC                                     | 0                | 6.2              | 1,778            | 31,002           | 32,787    |
| CO                                      | 0                | 15               | 249              | 38,985           | 39,249    |
| NO <sub>x</sub>                         | 0                | 47               | 1,634            | 7,493            | 9,174     |
| PM <sub>10</sub>                        | 0                | 105              | 949              | 8,622            | 9,675     |
| PM <sub>2.5</sub>                       | 0                | 40               | 464              | 3,873            | 4,377     |
| SO <sub>x</sub>                         | 0                | 420              | 1,922            | 13,426           | 15,768    |
| <b>High case (coal electric supply)</b> |                  |                  |                  |                  |           |
| CO <sub>2</sub>                         | 522,422          | 38,650           | 1,183,441        | 7,401,062        | 9,145,574 |
| CH <sub>4</sub>                         | 569              | 105              | 1,817            | 11,772           | 14,263    |
| N <sub>2</sub> O                        | 5.2              | 0.4              | 14               | 73               | 92        |
| CO <sub>2</sub> e                       | 538,194          | 41,397           | 1,233,111        | 7,717,018        | 9,529,721 |
| VOC                                     | 41               | 7.6              | 1,832            | 31,232           | 33,112    |
| CO                                      | 103              | 18               | 384              | 39,566           | 40,072    |
| NO <sub>x</sub>                         | 548              | 65               | 2,351            | 10,575           | 13,540    |
| PM <sub>10</sub>                        | 839              | 133              | 2,047            | 13,342           | 16,361    |
| PM <sub>2.5</sub>                       | 218              | 48               | 645              | 5,065            | 5,975     |
| SO <sub>x</sub>                         | 1,369            | 465              | 3,712            | 21,102           | 26,648    |

The battery assembly and upstream emissions reported are for the GREET default three batteries per vehicle lifetime.

Table S2. Lifetime emissions (grams) summary for an HEV with n NiMH battery

|                                         | Battery assembly | Battery upstream | Vehicle assembly | Vehicle upstream | Total      |
|-----------------------------------------|------------------|------------------|------------------|------------------|------------|
| <b>Base case (US avg grid mix)</b>      |                  |                  |                  |                  |            |
| CO <sub>2</sub>                         | 653,892          | 721,252          | 927,115          | 5,654,728        | 7,956,987  |
| CH <sub>4</sub>                         | 880              | 1,096            | 1,582            | 9,708            | 13,267     |
| N <sub>2</sub> O                        | 9.3              | 9.6              | 13               | 63               | 95         |
| CO <sub>2</sub> e                       | 678,657          | 751,511          | 970,605          | 5,916,055        | 8,316,828  |
| VOC                                     | 59               | 78               | 1,817            | 30,952           | 32,905     |
| CO                                      | 174              | 916              | 362              | 34,642           | 36,094     |
| NO <sub>x</sub>                         | 713              | 849              | 2,100            | 8,677            | 12,338     |
| PM <sub>10</sub>                        | 861              | 1,011            | 1,511            | 9,414            | 12,797     |
| PM <sub>2.5</sub>                       | 227              | 313              | 560              | 3,873            | 4,973      |
| SO <sub>x</sub>                         | 1,567            | 10,531           | 2,945            | 21,499           | 36,542     |
| <b>Low case (hydroelectric supply)</b>  |                  |                  |                  |                  |            |
| CO <sub>2</sub>                         | 0                | 159,669          | 500,209          | 3,940,502        | 4,600,380  |
| CH <sub>4</sub>                         | 0                | 342              | 785              | 7,363            | 8,490      |
| N <sub>2</sub> O                        | 0                | 1.6              | 4.8              | 38               | 44         |
| CO <sub>2</sub> e                       | 0                | 168,696          | 521,271          | 4,135,756        | 4,825,723  |
| VOC                                     | 0                | 27               | 1,778            | 30,799           | 32,605     |
| CO                                      | 0                | 766              | 249              | 34,186           | 35,201     |
| NO <sub>x</sub>                         | 0                | 237              | 1,634            | 6,809            | 8,680      |
| PM <sub>10</sub>                        | 0                | 272              | 949              | 7,157            | 8,378      |
| PM <sub>2.5</sub>                       | 0                | 118              | 464              | 3,295            | 3,876      |
| SO <sub>x</sub>                         | 0                | 9,187            | 1,922            | 17,401           | 28,510     |
| <b>High case (coal electric Supply)</b> |                  |                  |                  |                  |            |
| CO <sub>2</sub>                         | 1,046,359        | 1,058,315        | 1,183,441        | 6,683,496        | 9,971,612  |
| CH <sub>4</sub>                         | 1,140            | 1,319            | 1,817            | 10,401           | 14,677     |
| N <sub>2</sub> O                        | 10               | 11               | 14               | 65               | 101        |
| CO <sub>2</sub> e                       | 1,077,950        | 1,094,424        | 1,233,111        | 6,963,017        | 10,368,502 |
| VOC                                     | 82               | 98               | 1,832            | 31,014           | 33,025     |
| CO                                      | 207              | 944              | 384              | 34,729           | 36,264     |
| NO <sub>x</sub>                         | 1,097            | 1,180            | 2,351            | 9,686            | 14,314     |
| PM <sub>10</sub>                        | 1,681            | 1,716            | 2,047            | 11,563           | 17,006     |
| PM <sub>2.5</sub>                       | 436              | 493              | 645              | 4,405            | 5,979      |
| SO <sub>x</sub>                         | 2,742            | 11,539           | 3,712            | 24,572           | 42,566     |

The battery assembly and upstream emissions reported are for the GREET default two batteries per vehicle lifetime. Battery values reported here are scaled for battery life sensitivity cases.

**Table S3. Lifetime emissions (grams) summary for an HEV with a Li-ion battery**

|                                         | Battery assembly | Battery upstream | Vehicle assembly | Vehicle upstream | Total     |
|-----------------------------------------|------------------|------------------|------------------|------------------|-----------|
| <b>Base Case (US avg Grid Mix)</b>      |                  |                  |                  |                  |           |
| CO <sub>2</sub>                         | 113,925          | 339,183          | 927,115          | 5,734,388        | 7,114,611 |
| CH <sub>4</sub>                         | 153              | 530              | 1,582            | 9,847            | 12,113    |
| N <sub>2</sub> O                        | 1.6              | 4.5              | 13               | 63               | 83        |
| CO <sub>2</sub> e                       | 118,240          | 353,791          | 970,605          | 5,999,467        | 7,442,103 |
| VOC                                     | 10               | 34               | 1,817            | 30,964           | 32,825    |
| CO                                      | 30               | 103              | 362              | 35,251           | 35,746    |
| NO <sub>x</sub>                         | 124              | 414              | 2,100            | 8,766            | 11,405    |
| PM <sub>10</sub>                        | 150              | 514              | 1,511            | 9,559            | 11,734    |
| PM <sub>2.5</sub>                       | 40               | 170              | 560              | 3,931            | 4,700     |
| SO <sub>x</sub>                         | 273              | 2,226            | 2,945            | 21,814           | 27,258    |
| <b>Low case (hydroelectric supply)</b>  |                  |                  |                  |                  |           |
| CO <sub>2</sub>                         | 0                | 97,016           | 500,209          | 3,995,382        | 4,592,607 |
| CH <sub>4</sub>                         | 0                | 205              | 785              | 7,469            | 8,459     |
| N <sub>2</sub> O                        | 0                | 1.1              | 4.8              | 38               | 44        |
| CO <sub>2</sub> e                       | 0                | 102,474          | 521,271          | 4,193,458        | 4,817,203 |
| VOC                                     | 0                | 12               | 1,778            | 30,809           | 32,600    |
| CO                                      | 0                | 38               | 249              | 34,788           | 35,075    |
| NO <sub>x</sub>                         | 0                | 151              | 1,634            | 6,871            | 8,656     |
| PM <sub>10</sub>                        | 0                | 195              | 949              | 7,270            | 8,414     |
| PM <sub>2.5</sub>                       | 0                | 86               | 464              | 3,344            | 3,894     |
| SO <sub>x</sub>                         | 0                | 1,647            | 1,922            | 17,657           | 21,226    |
| <b>High case (coal electric supply)</b> |                  |                  |                  |                  |           |
| CO <sub>2</sub>                         | 182,303          | 484,531          | 1,183,441        | 6,778,030        | 8,628,306 |
| CH <sub>4</sub>                         | 199              | 626              | 1,817            | 10,550           | 13,192    |
| N <sub>2</sub> O                        | 1.8              | 4.9              | 14               | 66               | 87        |
| CO <sub>2</sub> e                       | 187,807          | 501,661          | 1,233,111        | 7,061,558        | 8,984,138 |
| VOC                                     | 14               | 43               | 1,832            | 31,027           | 32,915    |
| CO                                      | 36               | 115              | 384              | 35,339           | 35,874    |
| NO <sub>x</sub>                         | 191              | 557              | 2,351            | 9,790            | 12,889    |
| PM <sub>10</sub>                        | 293              | 818              | 2,047            | 11,739           | 14,897    |
| PM <sub>2.5</sub>                       | 76               | 247              | 645              | 4,471            | 5,440     |
| SO <sub>x</sub>                         | 478              | 2,661            | 3,712            | 24,932           | 31,783    |

The battery assembly and upstream emissions reported are for the GREET default one battery per vehicle lifetime. Battery values reported here are scaled for battery life sensitivity cases.

**Table S4. GREET results for conventional gasoline to US refineries (grams per million British thermal units of finished gasoline product)**

|                       | CO <sub>2</sub> | CH <sub>4</sub> | N <sub>2</sub> O | CO <sub>2</sub> e | NO <sub>x</sub> | PM <sub>10</sub> | PM <sub>2.5</sub> | SO <sub>2</sub> | VOC | CO  |
|-----------------------|-----------------|-----------------|------------------|-------------------|-----------------|------------------|-------------------|-----------------|-----|-----|
| <b>0% oil sands</b>   |                 |                 |                  |                   |                 |                  |                   |                 |     |     |
| Feedstock production  | 5,131           | 93              | 0.09             | 7,486             | 28              | 2.7              | 1.7               | 11              | 3.7 | 6.3 |
| Fuel refining         | 11,138          | 14              | 0.15             | 11,536            | 17              | 4.1              | 2.1               | 12              | 23  | 5.9 |
| Total                 | 16,268          | 107             | 0.24             | 19,022            | 45              | 6.8              | 3.7               | 24              | 27  | 12  |
| <b>9.4% oil sands</b> |                 |                 |                  |                   |                 |                  |                   |                 |     |     |
| Feedstock production  | 3,956           | 91              | 0.08             | 6,263             | 28              | 2.6              | 1.6               | 12              | 3.6 | 6.1 |
| Fuel refining         | 11,111          | 14              | 0.15             | 11,508            | 17              | 4.1              | 2.1               | 12              | 23  | 5.9 |
| Total                 | 15,068          | 105             | 0.22             | 17,771            | 46              | 6.7              | 3.7               | 24              | 27  | 12  |
| <b>100% oil sands</b> |                 |                 |                  |                   |                 |                  |                   |                 |     |     |
| Feedstock production  | 16,416          | 110             | 0.22             | 19,244            | 27              | 3.9              | 2.0               | 8.4             | 4.5 | 7.6 |
| Fuel refining         | 11,392          | 15              | 0.15             | 11,801            | 17              | 4.1              | 2.1               | 12              | 23  | 5.9 |
| Total                 | 27,808          | 125             | 0.37             | 31,045            | 44              | 8.0              | 4.1               | 21              | 27  | 14  |



**Table S5. Emissions from power generation (grams of pollutant per megawatt hour)**

| GHG value case | Upstream location case | Net damages case | Direct emissions       |                 |                  |                   |                 | Upstream emissions     |     |                 |                  |                   |                 |     |     |     |     |
|----------------|------------------------|------------------|------------------------|-----------------|------------------|-------------------|-----------------|------------------------|-----|-----------------|------------------|-------------------|-----------------|-----|-----|-----|-----|
|                |                        |                  | GHG, CO <sub>2</sub> e | NO <sub>x</sub> | PM <sub>10</sub> | PM <sub>2.5</sub> | SO <sub>2</sub> | GHG, CO <sub>2</sub> e | CO  | NO <sub>x</sub> | PM <sub>10</sub> | PM <sub>2.5</sub> | SO <sub>2</sub> | VOC |     |     |     |
| Zero           | 5% best                | 5% best          | 0                      | 0               | 0                | 0                 | 0               | 0                      | 0   | 0               | 0                | 0                 | 0               | 0   | 0   | 0   | 0   |
| Zero           | 5% best                | 50% median       | 894,914                | 1,348           | 188              | 128               | 329             | 44,349                 | 25  | 139             | 1,622            | 404               | 68              | 73  | 73  | 73  | 73  |
| Zero           | 5% best                | 95% worst        | 896,832                | 2,079           | 570              | 499               | 11,627          | 44,444                 | 25  | 139             | 1,626            | 405               | 69              | 73  | 73  | 73  | 73  |
| Zero           | 5% best                | weighted avg     | 575,841                | 872             | 143              | 119               | 2,392           | 37,105                 | 24  | 106             | 924              | 230               | 53              | 49  | 49  | 49  | 49  |
| Zero           | 95% worst              | 5% best          | 0                      | 0               | 0                | 0                 | 0               | 0                      | 0   | 0               | 0                | 0                 | 0               | 0   | 0   | 0   | 0   |
| Zero           | 95% worst              | 50% median       | 636,248                | 45              | 58               | 57                | 6               | 113,089                | 91  | 261             | 10               | 6                 | 135             | 67  | 67  | 67  | 67  |
| Zero           | 95% worst              | 95% worst        | 809,372                | 1,252           | 562              | 431               | 9,395           | 40,111                 | 23  | 126             | 1,467            | 365               | 62              | 66  | 66  | 66  | 66  |
| Zero           | 95% worst              | weighted avg     | 575,841                | 872             | 143              | 119               | 2,392           | 37,105                 | 24  | 106             | 924              | 230               | 53              | 49  | 49  | 49  | 49  |
| Low            | 5% best                | 5% best          | 0                      | 0               | 0                | 0                 | 0               | 0                      | 0   | 0               | 0                | 0                 | 0               | 0   | 0   | 0   | 0   |
| Low            | 5% best                | 50% median       | 1,113,857              | 1,810           | 4                | 4                 | 3               | 114,343                | 92  | 264             | 10               | 6                 | 137             | 68  | 68  | 68  | 68  |
| Low            | 5% best                | 95% worst        | 901,170                | 1,606           | 382              | 353               | 10,799          | 44,744                 | 25  | 140             | 1,637            | 407               | 69              | 74  | 74  | 74  | 74  |
| Low            | 5% best                | weighted avg     | 575,841                | 872             | 143              | 119               | 2,392           | 37,105                 | 24  | 106             | 924              | 230               | 53              | 49  | 49  | 49  | 49  |
| Low            | 95% worst              | 5% best          | 0                      | 0               | 0                | 0                 | 0               | 0                      | 0   | 0               | 0                | 0                 | 0               | 0   | 0   | 0   | 0   |
| Low            | 95% worst              | 50% median       | 910,850                | 1,448           | 236              | 155               | 2,473           | 45,139                 | 25  | 75              | 1,651            | 411               | 70              | 75  | 75  | 75  | 75  |
| Low            | 95% worst              | 95% worst        | 1,388,666              | 977             | 233              | 212               | 4,018           | 68,462                 | 39  | 113             | 2,504            | 623               | 106             | 113 | 113 | 113 | 113 |
| Low            | 95% worst              | weighted avg     | 575,841                | 872             | 143              | 119               | 2,392           | 37,105                 | 24  | 49              | 924              | 230               | 53              | 49  | 49  | 49  | 49  |
| Medium         | 5% best                | 5% best          | 0                      | 0               | 0                | 0                 | 0               | 0                      | 0   | 0               | 0                | 0                 | 0               | 0   | 0   | 0   | 0   |
| Medium         | 5% best                | 50% median       | 935,561                | 2,427           | 351              | 214               | 730             | 46,431                 | 26  | 145             | 1,698            | 423               | 72              | 77  | 77  | 77  | 77  |
| Medium         | 5% best                | 95% worst        | 917,482                | 1,837           | 654              | 551               | 9,334           | 45,470                 | 26  | 142             | 1,663            | 414               | 70              | 75  | 75  | 75  | 75  |
| Medium         | 5% best                | weighted avg     | 575,841                | 872             | 143              | 119               | 2,392           | 37,105                 | 24  | 106             | 924              | 230               | 53              | 49  | 49  | 49  | 49  |
| Medium         | 95% worst              | 5% best          | 0                      | 0               | 0                | 0                 | 0               | 0                      | 0   | 0               | 0                | 0                 | 0               | 0   | 0   | 0   | 0   |
| Medium         | 95% worst              | 50% median       | 951,970                | 1,534           | 122              | 109               | 600             | 47,217                 | 27  | 148             | 1,727            | 430               | 73              | 78  | 78  | 78  | 78  |
| Medium         | 95% worst              | 95% worst        | 1,017,587              | 1,695           | 374              | 374               | 7,298           | 50,459                 | 28  | 158             | 1,846            | 459               | 78              | 83  | 83  | 83  | 83  |
| Medium         | 95% worst              | weighted avg     | 575,841                | 872             | 143              | 119               | 2,392           | 37,105                 | 24  | 106             | 924              | 230               | 53              | 49  | 49  | 49  | 49  |
| High           | 5% best                | 5% best          | 0                      | 0               | 0                | 0                 | 0               | 0                      | 0   | 0               | 0                | 0                 | 0               | 0   | 0   | 0   | 0   |
| High           | 5% best                | 50% median       | 823,780                | 1,584           | 22               | 10                | 2               | 147,352                | 119 | 340             | 12               | 8                 | 176             | 88  | 88  | 88  | 88  |
| High           | 5% best                | 95% worst        | 876,417                | 1,902           | 539              | 356               | 11,249          | 43,776                 | 25  | 137             | 1,601            | 399               | 68              | 72  | 72  | 72  | 72  |
| High           | 5% best                | weighted avg     | 575,841                | 872             | 143              | 119               | 2,392           | 37,105                 | 24  | 106             | 924              | 230               | 53              | 49  | 49  | 49  | 49  |
| High           | 95% worst              | 5% best          | 0                      | 0               | 0                | 0                 | 0               | 0                      | 0   | 0               | 0                | 0                 | 0               | 0   | 0   | 0   | 0   |
| High           | 95% worst              | 50% median       | 863,164                | 3,330           | 148              | 148               | 54              | 154,860                | 125 | 357             | 13               | 8                 | 185             | 92  | 92  | 92  | 92  |
| High           | 95% worst              | 95% worst        | 995,350                | 2,465           | 1,124            | 707               | 11,866          | 49,612                 | 28  | 155             | 1,815            | 452               | 77              | 82  | 82  | 82  | 82  |
| High           | 95% worst              | weighted avg     | 575,841                | 872             | 143              | 119               | 2,392           | 37,105                 | 24  | 106             | 924              | 230               | 53              | 49  | 49  | 49  | 49  |

**Table S6. Portion of distance driven in CD mode**

|                                         | PHEV20  | PHEV60       |
|-----------------------------------------|---------|--------------|
| Drivetrain                              | split   | series       |
| CD control strategy                     | blended | all-electric |
| CD-mode range                           | 20.6 km | 40.9 km      |
| Portion of distance traveled in CD mode | 28%     | 47%          |

NHTS data truncated at 1,000 mi (1600 km).



**Table S8. Vehicle assembly emissions valuation cases (\$<sub>2010</sub>/t)**

| Location                   | CO  | NO <sub>x</sub> | PM <sub>10</sub> | PM <sub>2.5</sub> | SO <sub>2</sub> | VOC   |
|----------------------------|-----|-----------------|------------------|-------------------|-----------------|-------|
| <b>Base case emissions</b> |     |                 |                  |                   |                 |       |
| 5% best                    | 68  | 1,994           | 817              | 4,962             | 1,824           | 1,716 |
| 50% median                 | 548 | 2,305           | 5,466            | 29,493            | 3,830           | 2,338 |
| 95% worst                  | 713 | 3,622           | 7,889            | 60,052            | 18,448          | 3,624 |
| Avg auto counties          | 448 | 2,577           | 4,763            | 31,966            | 12,735          | 2,400 |
| <b>Low emissions</b>       |     |                 |                  |                   |                 |       |
| 5% best                    | 54  | 1,937           | 681              | 4,261             | 1,919           | 1,591 |
| 50% median                 | 129 | 2,704           | 1,481            | 9,270             | 7,088           | 2,527 |
| 95% worst                  | 760 | 3,200           | 7,979            | 63,770            | 18,209          | 3,281 |
| Avg auto counties          | 448 | 2,577           | 4,763            | 31,966            | 12,735          | 2,400 |
| <b>High emissions</b>      |     |                 |                  |                   |                 |       |
| 5% best                    | 111 | 752             | 1,134            | 6,050             | 3,033           | 717   |
| 50% median                 | 120 | 3,149           | 1,425            | 9,739             | 6,875           | 2,703 |
| 95% worst                  | 760 | 3,200           | 7,979            | 63,770            | 18,209          | 3,281 |
| Avg auto counties          | 448 | 2,577           | 4,763            | 31,966            | 12,735          | 2,400 |

CO<sub>2</sub>e costs (\$<sub>2010</sub>/t) are varied in the GHG valuation scenario at \$14 (low), \$42 (medium, base), \$140 (high), or \$0 (zero).

**Table S9. Battery assembly emissions valuation cases (\$<sub>2010</sub>/t)**

| Location                   | CO  | NO <sub>x</sub> | PM <sub>10</sub> | PM <sub>2.5</sub> | SO <sub>2</sub> | VOC   |
|----------------------------|-----|-----------------|------------------|-------------------|-----------------|-------|
| <b>Base case emissions</b> |     |                 |                  |                   |                 |       |
| 5% best                    | 79  | 2,380           | 937              | 5,937             | 1,936           | 2,065 |
| 50% median                 | 134 | 1,543           | 1,546            | 11,730            | 7,829           | 1,497 |
| 95% worst                  | 627 | 3,730           | 6,960            | 51,878            | 19,196          | 3,732 |
| Avg auto counties          | 448 | 2,577           | 4,763            | 31,966            | 12,735          | 2,400 |
| <b>Low emissions</b>       |     |                 |                  |                   |                 |       |
| 5% best                    | N/A | N/A             | N/A              | N/A               | N/A             | N/A   |
| 50% median                 | N/A | N/A             | N/A              | N/A               | N/A             | N/A   |
| 95% worst                  | N/A | N/A             | N/A              | N/A               | N/A             | N/A   |
| Avg auto counties          | 448 | 2,577           | 4,763            | 31,966            | 12,735          | 2,400 |
| <b>High emissions</b>      |     |                 |                  |                   |                 |       |
| 5% best                    | 53  | 1,060           | 649              | 3,338             | 2,934           | 1,021 |
| 50% median                 | 145 | 3,298           | 1,677            | 11,208            | 7,155           | 2,916 |
| 95% worst                  | 591 | 9,337           | 6,860            | 47,888            | 17,173          | 8,766 |
| Avg auto counties          | 448 | 2,577           | 4,763            | 31,966            | 12,735          | 2,400 |

CO<sub>2</sub>e costs (\$<sub>2010</sub>/t) are varied in the GHG valuation scenario at \$14 (low), \$42 (medium, base), \$140 (high), or \$0 (zero). N/A, not applicable.



Table S10. Vehicle upstream emissions valuation cases (\$<sub>2010</sub>/t)

| Location                               | CO  | NO <sub>x</sub> | PM <sub>10</sub> | PM <sub>2.5</sub> | SO <sub>2</sub> | VOC   |
|----------------------------------------|-----|-----------------|------------------|-------------------|-----------------|-------|
| <b>Conventional vehicle</b>            |     |                 |                  |                   |                 |       |
| <i>Base case emissions</i>             |     |                 |                  |                   |                 |       |
| 5% best                                | 49  | 182             | 637              | 4,127             | 2,720           | 395   |
| 50% median                             | 109 | 3,021           | 1,426            | 8,158             | 7,131           | 882   |
| 95% worst                              | 500 | 3,623           | 6,560            | 48,848            | 16,962          | 4,681 |
| Avg all counties                       | 184 | 2,009           | 2,418            | 16,241            | 7,131           | 1,579 |
| Avg auto counties                      | 448 | 2,577           | 4,763            | 31,966            | 12,735          | 2,400 |
| <i>Low emissions</i>                   |     |                 |                  |                   |                 |       |
| 5% best                                | 49  | 182             | 637              | 4,127             | 2,720           | 395   |
| 50% median                             | 111 | 1,561           | 1,458            | 10,667            | 7,018           | 1,039 |
| 95% worst                              | 627 | 1,309           | 8,226            | 56,613            | 14,325          | 5,328 |
| Avg all counties                       | 184 | 2,009           | 2,418            | 16,241            | 7,131           | 1,579 |
| Avg auto counties                      | 448 | 2,577           | 4,763            | 31,966            | 12,735          | 2,400 |
| <i>High emissions</i>                  |     |                 |                  |                   |                 |       |
| 5% best                                | 66  | 1,512           | 859              | 3,732             | 2,163           | 371   |
| 50% median                             | 106 | 2,445           | 1,392            | 8,231             | 7,464           | 817   |
| 95% worst                              | 643 | 5,158           | 8,426            | 56,061            | 13,066          | 5,508 |
| Avg all counties                       | 184 | 2,009           | 2,418            | 16,241            | 7,131           | 1,579 |
| Avg auto counties                      | 448 | 2,577           | 4,763            | 31,966            | 12,735          | 2,400 |
| <b>Hybrid electric vehicle</b>         |     |                 |                  |                   |                 |       |
| <i>Base case emissions</i>             |     |                 |                  |                   |                 |       |
| 5% best                                | 43  | 854             | 564              | 2,861             | 2,734           | 276   |
| 50% median                             | 98  | 3,279           | 1,284            | 8,543             | 6,803           | 923   |
| 95% worst                              | 832 | 4,083           | 10,904           | 65,414            | 10,935          | 6,260 |
| Avg all counties                       | 184 | 2,009           | 2,418            | 16,241            | 7,131           | 1,579 |
| Avg auto counties                      | 448 | 2,577           | 4,763            | 31,966            | 12,735          | 2,400 |
| <i>Low emissions</i>                   |     |                 |                  |                   |                 |       |
| 5% best                                | 52  | 1,541           | 687              | 3,600             | 2,204           | 368   |
| 50% median                             | 110 | 2,769           | 1,440            | 8,157             | 7,295           | 838   |
| 95% worst                              | 643 | 5,158           | 8,426            | 56,061            | 13,066          | 5,508 |
| Avg all counties                       | 184 | 2,009           | 2,418            | 16,241            | 7,131           | 1,579 |
| Avg auto counties                      | 448 | 2,577           | 4,763            | 31,966            | 12,735          | 2,400 |
| <i>High emissions</i>                  |     |                 |                  |                   |                 |       |
| 5% best                                | 76  | 1,542           | 999              | 3,870             | 2,113           | 392   |
| 50% median                             | 96  | 2,705           | 1,261            | 9,378             | 6,842           | 921   |
| 95% worst                              | 508 | 2,917           | 6,660            | 48,368            | 16,787          | 4,636 |
| Avg all counties                       | 184 | 2,009           | 2,418            | 16,241            | 7,131           | 1,579 |
| Avg auto counties                      | 448 | 2,577           | 4,763            | 31,966            | 12,735          | 2,400 |
| <b>Plug-in hybrid electric vehicle</b> |     |                 |                  |                   |                 |       |
| <i>Base case emissions</i>             |     |                 |                  |                   |                 |       |
| 5% best                                | 80  | 971             | 1,044            | 3,887             | 2,357           | 377   |
| 50% median                             | 98  | 3,279           | 1,284            | 8,543             | 6,803           | 923   |
| 95% worst                              | 508 | 2,917           | 6,660            | 48,368            | 16,787          | 4,636 |
| Avg all counties                       | 184 | 2,009           | 2,418            | 16,241            | 7,131           | 1,579 |
| Avg auto counties                      | 448 | 2,577           | 4,763            | 31,966            | 12,735          | 2,400 |
| <i>Low emissions</i>                   |     |                 |                  |                   |                 |       |
| 5% best                                | 55  | 1,776           | 726              | 4,497             | 1,794           | 452   |
| 50% median                             | 96  | 2,226           | 1,258            | 9,478             | 7,048           | 956   |
| 95% worst                              | 643 | 5,158           | 8,426            | 56,061            | 13,066          | 5,508 |
| Avg all counties                       | 184 | 2,009           | 2,418            | 16,241            | 7,131           | 1,579 |
| Avg auto counties                      | 448 | 2,577           | 4,763            | 31,966            | 12,735          | 2,400 |
| <i>High emissions</i>                  |     |                 |                  |                   |                 |       |
| 5% best                                | 76  | 1,542           | 999              | 3,870             | 2,113           | 392   |
| 50% median                             | 96  | 2,705           | 1,261            | 9,378             | 6,842           | 921   |
| 95% worst                              | 508 | 2,917           | 6,660            | 48,368            | 16,787          | 4,636 |
| Avg all counties                       | 184 | 2,009           | 2,418            | 16,241            | 7,131           | 1,579 |
| Avg auto counties                      | 448 | 2,577           | 4,763            | 31,966            | 12,735          | 2,400 |

CO<sub>2e</sub> costs (\$<sub>2010</sub>/t) are varied in the GHG valuation scenario at \$14 (low), \$42 (medium), \$140 (high), or \$0 (zero).

**Table S11. Battery upstream emissions valuation cases (\$<sub>2010</sub>/t)**

| Location                                | CO  | NO <sub>x</sub> | PM <sub>10</sub> | PM <sub>2.5</sub> | SO <sub>2</sub> | VOC   |
|-----------------------------------------|-----|-----------------|------------------|-------------------|-----------------|-------|
| <b>Pb acid for conventional vehicle</b> |     |                 |                  |                   |                 |       |
| <i>Base case emissions</i>              |     |                 |                  |                   |                 |       |
| 5% best                                 | 74  | 1,534           | 967              | 3,807             | 2,153           | 389   |
| 50% median                              | 189 | 2,070           | 2,483            | 16,333            | 6,163           | 1,560 |
| 95% worst                               | 449 | 3,168           | 5,887            | 43,486            | 17,322          | 4,198 |
| Avg all counties                        | 184 | 2,009           | 2,418            | 16,241            | 7,131           | 1,579 |
| Avg auto counties                       | 448 | 2,577           | 4,763            | 31,966            | 12,735          | 2,400 |
| <i>Low emissions</i>                    |     |                 |                  |                   |                 |       |
| 5% best                                 | 66  | 1,512           | 859              | 3,732             | 2,163           | 371   |
| 50% median                              | 97  | 2,768           | 1,268            | 8,125             | 6,898           | 863   |
| 95% worst                               | 449 | 3,168           | 5,887            | 43,486            | 17,322          | 4,198 |
| Avg all counties                        | 184 | 2,009           | 2,418            | 16,241            | 7,131           | 1,579 |
| Avg auto counties                       | 448 | 2,577           | 4,763            | 31,966            | 12,735          | 2,400 |
| <i>High emissions</i>                   |     |                 |                  |                   |                 |       |
| 5% best                                 | 61  | 1,909           | 801              | 5,074             | 1,970           | 507   |
| 50% median                              | 97  | 2,768           | 1,268            | 8,125             | 6,898           | 863   |
| 95% worst                               | 449 | 3,168           | 5,887            | 43,486            | 17,322          | 4,198 |
| Avg all counties                        | 184 | 2,009           | 2,418            | 16,241            | 7,131           | 1,579 |
| Avg auto counties                       | 448 | 2,577           | 4,763            | 31,966            | 12,735          | 2,400 |
| <b>NiMH battery for HEV</b>             |     |                 |                  |                   |                 |       |
| <i>Base case emissions</i>              |     |                 |                  |                   |                 |       |
| 5% best                                 | 60  | 1,435           | 783              | 3,713             | 2,170           | 368   |
| 50% median                              | 88  | 2,272           | 1,149            | 7,876             | 6,809           | 774   |
| 95% worst                               | 508 | 2,917           | 6,660            | 48,368            | 16,787          | 4,636 |
| Avg all counties                        | 184 | 2,009           | 2,418            | 16,241            | 7,131           | 1,579 |
| Avg auto counties                       | 448 | 2,577           | 4,763            | 31,966            | 12,735          | 2,400 |
| <i>Low emissions</i>                    |     |                 |                  |                   |                 |       |
| 5% best                                 | 86  | 2,335           | 1,121            | 6,603             | 2,099           | 670   |
| 50% median                              | 94  | 2,560           | 1,236            | 8,359             | 6,773           | 827   |
| 95% worst                               | 508 | 2,917           | 6,660            | 48,368            | 16,787          | 4,636 |
| Avg all counties                        | 184 | 2,009           | 2,418            | 16,241            | 7,131           | 1,579 |
| Avg auto counties                       | 448 | 2,577           | 4,763            | 31,966            | 12,735          | 2,400 |
| <i>High emissions</i>                   |     |                 |                  |                   |                 |       |
| 5% best                                 | 70  | 1,490           | 911              | 3,646             | 2,165           | 370   |
| 50% median                              | 94  | 2,560           | 1,236            | 8,359             | 6,773           | 827   |
| 95% worst                               | 468 | 5,435           | 6,135            | 41,304            | 16,818          | 4,182 |
| Avg all counties                        | 184 | 2,009           | 2,418            | 16,241            | 7,131           | 1,579 |
| Avg auto counties                       | 448 | 2,577           | 4,763            | 31,966            | 12,735          | 2,400 |
| <b>Li-ion battery for PHEV</b>          |     |                 |                  |                   |                 |       |
| <i>Base case emissions</i>              |     |                 |                  |                   |                 |       |
| 5% best                                 | 64  | 1,895           | 838              | 5,319             | 1,963           | 533   |
| 50% median                              | 85  | 2,206           | 1,117            | 7,744             | 6,910           | 760   |
| 95% worst                               | 788 | 1,167           | 10,333           | 54,940            | 16,624          | 5,207 |
| Avg all counties                        | 184 | 2,009           | 2,418            | 16,241            | 7,131           | 1,579 |
| Avg auto counties                       | 448 | 2,577           | 4,763            | 31,966            | 12,735          | 2,400 |
| <i>Low emissions</i>                    |     |                 |                  |                   |                 |       |
| 5% best                                 | 60  | 1,435           | 783              | 3,713             | 2,170           | 368   |
| 50% median                              | 101 | 2,888           | 1,325            | 9,201             | 6,732           | 919   |
| 95% worst                               | 788 | 1,167           | 10,333           | 54,940            | 16,624          | 5,207 |
| Avg all counties                        | 184 | 2,009           | 2,418            | 16,241            | 7,131           | 1,579 |
| Avg auto counties                       | 448 | 2,577           | 4,763            | 31,966            | 12,735          | 2,400 |
| <i>High emissions</i>                   |     |                 |                  |                   |                 |       |
| 5% best                                 | 66  | 1,512           | 859              | 3,732             | 2,163           | 371   |
| 50% median                              | 280 | 6,610           | 3,676            | 27,241            | 4,210           | 2,610 |
| 95% worst                               | 788 | 1,167           | 10,333           | 54,940            | 16,624          | 5,207 |
| Avg all counties                        | 184 | 2,009           | 2,418            | 16,241            | 7,131           | 1,579 |
| Avg auto counties                       | 448 | 2,577           | 4,763            | 31,966            | 12,735          | 2,400 |

CO<sub>2e</sub> costs (\$<sub>2010</sub>/t) are varied in the GHG valuation scenario at \$14 (low), \$42 (medium), \$140 (high), or \$0 (zero).

**Table S12. Gasoline production refinery emissions valuation cases (\$<sub>2010</sub>/t)**

| Location     | CO    | NO <sub>x</sub> | PM <sub>10</sub> | PM <sub>2.5</sub> | SO <sub>2</sub> | VOC    |
|--------------|-------|-----------------|------------------|-------------------|-----------------|--------|
| 5% best      | 45    | 951             | 552              | 2,807             | 1,754           | 273    |
| 50% median   | 130   | 3,000           | 1,463            | 11,398            | 3,289           | 1,094  |
| 95% worst    | 3,828 | 667             | 39,578           | 235,784           | 144,782         | 21,860 |
| Weighted avg | 648   | 2,006           | 6,712            | 43,844            | 18,016          | 4,136  |

**Table S13. Gasoline production upstream emissions valuation cases (\$<sub>2010</sub>/t)**

| Location              | CO  | NO <sub>x</sub> | PM <sub>10</sub> | PM <sub>2.5</sub> | SO <sub>2</sub> | VOC   |
|-----------------------|-----|-----------------|------------------|-------------------|-----------------|-------|
| <b>0% oil sands</b>   |     |                 |                  |                   |                 |       |
| 5% best               | 36  | 612             | 478              | 1,996             | 3,387           | 197   |
| 50% median            | 153 | 1,904           | 2,009            | 11,965            | 3,705           | 1,154 |
| 95% worst             | 998 | 5               | 13,091           | 103,298           | 20,948          | 9,812 |
| Weighted avg          | 241 | 2,877           | 3,160            | 21,868            | 7,489           | 2,092 |
| <b>9.4% oil sands</b> |     |                 |                  |                   |                 |       |
| 5% best               | 50  | 1,178           | 660              | 3,162             | 1,759           | 313   |
| 50% median            | 153 | 1,904           | 2,009            | 11,965            | 3,705           | 1,154 |
| 95% worst             | 998 | 5               | 13,091           | 103,298           | 20,948          | 9,812 |
| Weighted avg          | 241 | 2,877           | 3,160            | 21,868            | 7,489           | 2,092 |
| <b>100% oil sands</b> |     |                 |                  |                   |                 |       |
| 5% best               | 32  | 726             | 422              | 1,945             | 3,560           | 193   |
| 50% median            | 92  | 2,709           | 1,211            | 8,234             | 2,221           | 800   |
| 95% worst             | 549 | 1,374           | 7,197            | 42,517            | 35,894          | 4,035 |
| Weighted avg          | 241 | 2,877           | 3,160            | 21,868            | 7,489           | 2,092 |

For each of the oil sands scenarios (0%, 9.4%, and 100%) shown, CO<sub>2</sub>e costs (\$<sub>2010</sub>/t) are varied in a GHG valuation scenario at \$14 (low), \$42 (medium, base), \$140 (high), or \$0 (zero).

**Table S14. Valuation of upstream emissions for coal and natural gas (¢<sub>2010</sub>/GJ of fuel)**

| Pollutant         | Natural gas |           | Coal    |           |
|-------------------|-------------|-----------|---------|-----------|
|                   | Low, 5%     | High, 95% | Low, 5% | High, 95% |
| NO <sub>x</sub>   | 0.81        | 4.39      | 4.56    | 4.01      |
| PM <sub>2.5</sub> | 0.00        | 0.00      | 0.00    | 0.00      |
| SO <sub>2</sub>   | 102.93      | 232.67    | 4.19    | 19.52     |
| PM <sub>10</sub>  | 0.00        | 0.00      | 0.06    | 0.33      |
| CO                | 0.16        | 0.92      | 0.71    | 0.62      |





**Table S16. Driving pollutant valuation (\$<sub>2010</sub>/t)**

| Pollutant         | Base case, weighted avg | Low damages, 5% best-rural | High damages, 95% worst-urban |
|-------------------|-------------------------|----------------------------|-------------------------------|
| VOC               | 7,159                   | 364                        | 16,110                        |
| NO <sub>x</sub>   | 3,445                   | 1,160                      | 9,232                         |
| PM <sub>2.5</sub> | 75,850                  | 3,729                      | 171,208                       |
| SO <sub>2</sub>   | 25,512                  | 2,173                      | 40,857                        |
| PM <sub>10</sub>  | 11,644                  | 786                        | 25,812                        |
| CO                | 886                     | 298                        | 2,374                         |

**Table S17. Externality costs due to supply disruption (\$<sub>2010</sub>/bbl) (69)**

|           | Domestic |       |       | Imports |      |       | Avg   |       |       |
|-----------|----------|-------|-------|---------|------|-------|-------|-------|-------|
|           | Low      | Mid   | High  | Low     | Mid  | High  | Low   | Mid   | High  |
| GDP loss  | 0.81     | 3.84  | 11.24 | 1.08    | 5.13 | 14.85 | 0.95  | 4.51  | 13.11 |
| Transfers | -0.61    | -0.88 | -2.07 | 0.07    | 0.12 | 0.26  | -0.96 | -0.37 | -0.16 |
| Total     | 0.20     | 2.96  | 9.16  | 1.16    | 5.24 | 15.01 | -0.01 | 4.15  | 12.96 |

**Table S18. Externality allocation to refined petroleum products (1)**

|                                            | Volumetric yield (gal output/bbl oil input) | Fraction of output |           |           | ¢/gal output per \$/bbl oil input |        |        |
|--------------------------------------------|---------------------------------------------|--------------------|-----------|-----------|-----------------------------------|--------|--------|
|                                            |                                             | Mass, %            | Energy, % | Volume, % | Mass                              | Energy | Volume |
|                                            |                                             |                    |           |           |                                   |        |        |
| Liquefied refinery gases                   | 1.764                                       | 2.66               | 2.58      | 3.94      | 1.51                              | 1.46   | 2.23   |
| Finished motor gasoline                    | 19.404                                      | 39.83              | 41.26     | 43.34     | 2.05                              | 2.13   | 2.23   |
| Finished aviation gasoline                 | 0.042                                       | 0.08               | 0.09      | 0.09      | 1.97                              | 2.04   | 2.23   |
| Kerosene-type jet fuel                     | 3.906                                       | 8.63               | 8.97      | 8.72      | 2.21                              | 2.30   | 2.23   |
| Kerosene                                   | 0.042                                       | 0.10               | 0.10      | 0.09      | 2.27                              | 2.30   | 2.23   |
| Distillate fuel oil                        | 11.256                                      | 26.42              | 26.54     | 25.14     | 2.35                              | 2.36   | 2.23   |
| Residual fuel oil                          | 1.680                                       | 4.42               | 4.28      | 3.75      | 2.63                              | 2.54   | 2.23   |
| Naphtha for petrochemical feedstock use    | 0.462                                       | 0.98               | 0.98      | 1.03      | 2.13                              | 2.12   | 2.23   |
| Other oils for petrochemical feedstock use | 0.420                                       | 0.89               | 0.89      | 0.94      | 2.13                              | 2.12   | 2.23   |
| Special naphthas                           | 0.084                                       | 0.18               | 0.18      | 0.19      | 2.13                              | 2.12   | 2.23   |
| Lubricants                                 | 0.420                                       | 1.05               | 1.03      | 0.94      | 2.50                              | 2.46   | 2.23   |
| Waxes                                      | 0.042                                       | 0.09               | 0.09      | 0.09      | 2.22                              | 2.24   | 2.23   |
| Petroleum coke                             | 2.226                                       | 7.07               | 5.43      | 4.97      | 3.18                              | 2.44   | 2.23   |
| Asphalt and road oil                       | 1.008                                       | 2.91               | 2.71      | 2.25      | 2.89                              | 2.69   | 2.23   |
| Still gas                                  | 1.806                                       | 4.22               | 4.39      | 4.03      | 2.33                              | 2.43   | 2.23   |
| Miscellaneous products                     | 0.210                                       | 0.46               | 0.49      | 0.47      | 2.18                              | 2.35   | 2.23   |

Barrels, bbl.

1 US Energy Information Administration (2010) *Petroleum and Other Liquids: Refinery Yield*. (US Energy Information Admin, Washington, DC).

**Table S19. Vehicle production and retail cost (\$<sub>2010</sub>)**

|                               | Vehicle total cost |        |        |        |        | High voltage battery system cost |       |        |        |        |
|-------------------------------|--------------------|--------|--------|--------|--------|----------------------------------|-------|--------|--------|--------|
|                               | CV                 | HEV    | PHEV20 | PHEV60 | BEV    | CV                               | HEV   | PHEV20 | PHEV60 | BEV    |
| 2015 literature review        | 15,346             | 17,912 | 18,865 | 22,973 | 35,771 | 0                                | 1,379 | 1,755  | 5,820  | 21,302 |
| 2015 DOE goals                | 15,346             | 17,227 | 18,023 | 20,459 | 26,099 | 0                                | 689   | 1,096  | 3,492  | 11,835 |
| 2015 literature review retail | 23,019             | 26,868 | 28,298 | 34,459 | 52,450 | 0                                | 2,068 | 2,632  | 8,730  | 31,953 |
| 2015 DOE goals retail         | 23,019             | 25,841 | 27,034 | 30,688 | 39,148 | 0                                | 1,033 | 1,645  | 5,239  | 17,752 |
| 2030 literature review        | 15,346             | 18,184 | 18,882 | 21,619 | 28,165 | 0                                | 956   | 1,170  | 3,873  | 13,479 |
| 2030 DOE goals                | 15,346             | 16,095 | 16,377 | 17,571 | 18,998 | 0                                | 503   | 479    | 1,652  | 6,221  |
| 2030 literature review retail | 23,020             | 27,276 | 28,323 | 32,429 | 42,247 | 0                                | 1,434 | 1,755  | 5,809  | 20,218 |
| 2030 DOE goals retail         | 23,020             | 26,214 | 26,638 | 28,427 | 30,568 | 0                                | 755   | 719    | 2,479  | 9,332  |

**Table S20. Oil premium (\$<sub>2010</sub>/gal)**

|                   | Low case | Base case | High case |
|-------------------|----------|-----------|-----------|
| Supply disruption | 0.00     | 0.09      | 0.28      |
| Monopsony premium | 0.07     | 0.22      | 0.45      |
| Military spending | 0.00     | 0.03      | 0.16      |
| Total             | 0.07     | 0.34      | 0.89      |

**Table S21. Operating Costs**

|               | Gasoline, \$/gal | Electricity, \$/kWh |
|---------------|------------------|---------------------|
| Min 2008–2010 | 1.590            | 0.1015              |
| Avg 2008–2010 | 2.751            | 0.1138              |
| Max 2008–2010 | 4.054            | 0.1206              |

**Table S22. Scheduled maintenance costs (\$<sub>2010</sub>/gal per vehicle life)**

|                                        | CV    | HEV   | PHEV  | BEV   |
|----------------------------------------|-------|-------|-------|-------|
| Lifetime oil change cost               | 1,486 | 1,413 | 926   | 0     |
| Lifetime air filter replacement costs  | 117   | 154   | 77    | 0     |
| Lifetime spark plug replacement costs  | 139   | 47    | 0     | 0     |
| Lifetime timing chain adjustment costs | 116   | 116   | 0     | 0     |
| Lifetime front brake replacement costs | 867   | 578   | 578   | 578   |
| Additional scheduled maintenance costs | 1,655 | 1,655 | 1,655 | 1,655 |
| Total                                  | 4,380 | 3,962 | 3,235 | 2,232 |

**Table S23. Charger costs (level 2) (\$<sub>2010</sub> per vehicle life)**

|           | Equipment | Installation | Total |
|-----------|-----------|--------------|-------|
| Low case  | 500       | 970          | 1,470 |
| Base case | 900       | 1,500        | 2,400 |
| High case | 2,500     | 4,000        | 6,500 |



Table S25. Summary of base case air emission and oil premium costs (\$<sub>2010</sub> per vehicle lifetime)

|                        | Air emissions |     |                 |                  |                   |                 |     | Oil premium |           |          | Total |
|------------------------|---------------|-----|-----------------|------------------|-------------------|-----------------|-----|-------------|-----------|----------|-------|
|                        | GHGs          | CO  | NO <sub>x</sub> | PM <sub>10</sub> | PM <sub>2.5</sub> | SO <sub>2</sub> | VOC | Disruption  | Monopsony | Military |       |
| <b>CV</b>              |               |     |                 |                  |                   |                 |     |             |           |          |       |
| Vehicle production     | 316           | 18  | 30              | 60               | 162               | 264             | 79  |             |           |          | 928   |
| Battery production     | 12            | 0   | 1               | 2                | 4                 | 12              | 0   |             |           |          | 30    |
| Gasoline production    | 290           | 2   | 51              | 16               | 56                | 137             | 45  |             |           |          | 597   |
| Electricity production | 0             | 0   | 0               | 0                | 0                 | 0               | 0   |             |           |          | 0     |
| Vehicle operation      | 1,408         | 292 | 22              | 31               | 106               | 0               | 102 | 335         | 829       | 120      | 3,246 |
| Total                  | 2,025         | 312 | 104             | 109              | 327               | 413             | 227 | 335         | 829       | 120      | 4,802 |
| <b>HEV</b>             |               |     |                 |                  |                   |                 |     |             |           |          |       |
| Vehicle production     | 287           | 16  | 28              | 52               | 142               | 311             | 79  |             |           |          | 915   |
| Battery production     | 30            | 0   | 2               | 4                | 9                 | 77              | 0   |             |           |          | 122   |
| Gasoline production    | 207           | 2   | 36              | 11               | 40                | 98              | 32  |             |           |          | 426   |
| Electricity production | 0             | 0   | 0               | 0                | 0                 | 0               | 0   |             |           |          | 0     |
| Vehicle operation      | 1,009         | 292 | 19              | 31               | 106               | 0               | 72  | 239         | 592       | 86       | 2,447 |
| Total                  | 1,533         | 310 | 85              | 99               | 296               | 486             | 183 | 239         | 592       | 86       | 3,910 |
| <b>PHEV20</b>          |               |     |                 |                  |                   |                 |     |             |           |          |       |
| Vehicle production     | 291           | 16  | 28              | 53               | 144               | 315             | 79  |             |           |          | 925   |
| Battery production     | 44            | 0   | 3               | 7                | 15                | 71              | 0   |             |           |          | 141   |
| Gasoline production    | 168           | 1   | 30              | 9                | 33                | 79              | 26  |             |           |          | 346   |
| Electricity production | 149           | 0   | 8               | 4                | 10                | 91              | 0   |             |           |          | 263   |
| Vehicle operation      | 819           | 209 | 13              | 29               | 91                | 0               | 52  | 194         | 481       | 70       | 1,958 |
| Total                  | 1,471         | 227 | 83              | 101              | 292               | 557             | 157 | 194         | 481       | 70       | 3,633 |
| <b>PHEV60</b>          |               |     |                 |                  |                   |                 |     |             |           |          |       |
| Vehicle production     | 291           | 16  | 28              | 53               | 144               | 315             | 79  |             |           |          | 925   |
| Battery production     | 151           | 0   | 11              | 24               | 51                | 244             | 1   |             |           |          | 482   |
| Gasoline production    | 146           | 1   | 26              | 8                | 28                | 69              | 23  |             |           |          | 300   |
| Electricity production | 439           | 0   | 25              | 11               | 30                | 268             | 0   |             |           |          | 772   |
| Vehicle operation      | 708           | 156 | 10              | 27               | 81                | 0               | 39  | 168         | 417       | 60       | 1,666 |
| Total                  | 1,734         | 174 | 99              | 123              | 333               | 896             | 141 | 168         | 417       | 60       | 4,146 |
| <b>BEV240</b>          |               |     |                 |                  |                   |                 |     |             |           |          |       |
| Vehicle production     | 291           | 16  | 28              | 53               | 144               | 315             | 79  |             |           |          | 925   |
| Battery production     | 532           | 2   | 44              | 101              | 213               | 1,012           | 3   |             |           |          | 1,906 |
| Gasoline production    | 0             | 0   | 0               | 0                | 0                 | 0               | 0   |             |           |          | 0     |
| Electricity production | 1,001         | 0   | 57              | 24               | 68                | 612             | 0   |             |           |          | 1,762 |
| Vehicle operation      | 0             | 0   | 0               | 22               | 52                | 0               | 0   | 0           | 0         | 0        | 75    |
| Total                  | 1,824         | 18  | 129             | 200              | 476               | 1,939           | 82  | 0           | 0         | 0        | 4,667 |

Table S26. Lifetime ownership costs (\$<sub>2010</sub> per vehicle lifetime)

|                          | CV     | HEV    | PHEV20 | PHEV60 | BEV    |
|--------------------------|--------|--------|--------|--------|--------|
| Base vehicle cost        | 23,019 | 24,800 | 25,666 | 25,729 | 20,497 |
| Initial battery cost     | 0      | 2,068  | 2,632  | 8,730  | 31,953 |
| Battery replacement cost | 0      | 0      | 0      | 0      | 0      |
| Gasoline cost            | 12,386 | 8,847  | 7,189  | 6,226  | 0      |
| Electricity cost         | 0      | 0      | 788    | 2,314  | 5,282  |
| Scheduled maint.         | 4,380  | 3,962  | 3,235  | 3,235  | 2,232  |
| Charger/instl.           | 0      | 0      | 1,200  | 2,400  | 2,400  |
| Net cost                 | 39,786 | 39,677 | 40,709 | 48,635 | 62,364 |
